# Supplementary material for: eg occupancy as an effective descriptor for the catalytic activity of perovskite oxide-based peroxidase mimics
Source: PubMed Central journal article supplement (PMC6370761; doi:10.1038/s41467-019-08657-5), 2019-02-11
Supplement: 41467_2019_8657_MOESM1_ESM.pdf [file 41467_2019_8657_MOESM1_ESM.pdf]

## Supporting Information

# **$e_g$ occupancy as an effective descriptor for the catalytic activity of perovskite oxide-based peroxidase mimics**

Wang *et al.*

## Table of contents

- Supplementary Figure 1.** Representative SEM images of  $\text{LaFeO}_3$ ,  $\text{La}_{0.5}\text{Sr}_{0.5}\text{FeO}_{3-\delta}$ , and  $\text{SrFeO}_{3-\delta}$ .
- Supplementary Figure 2.** Representative TEM images of  $\text{LaFeO}_3$ ,  $\text{La}_{0.5}\text{Sr}_{0.5}\text{FeO}_{3-\delta}$ , and  $\text{SrFeO}_{3-\delta}$ .
- Supplementary Figure 3.** Nitrogen adsorption-desorption isotherm curves for  $\text{LaFeO}_3$ ,  $\text{La}_{0.5}\text{Sr}_{0.5}\text{FeO}_{3-\delta}$ , and  $\text{SrFeO}_{3-\delta}$ .
- Supplementary Figure 4.** Representative SEM images of  $\text{LaMnO}_{3-\delta}$ ,  $\text{La}_{0.5}\text{Sr}_{0.5}\text{MnO}_{3-\delta}$ , and  $\text{CaMnO}_{3-\delta}$ .
- Supplementary Figure 5.** Representative TEM images of  $\text{LaMnO}_{3-\delta}$ ,  $\text{La}_{0.5}\text{Sr}_{0.5}\text{MnO}_{3-\delta}$ , and  $\text{CaMnO}_{3-\delta}$ .
- Supplementary Figure 6.** Nitrogen adsorption-desorption isotherm curves for  $\text{LaMnO}_{3-\delta}$ ,  $\text{La}_{0.5}\text{Sr}_{0.5}\text{MnO}_{3-\delta}$ , and  $\text{CaMnO}_{3-\delta}$ .
- Supplementary Figure 7.** Mn-based perovskite TMOs as peroxidase mimics.
- Supplementary Figure 8.** Representative SEM images of nickel contained perovskite TMOs.
- Supplementary Figure 9.** Representative TEM images of nickel contained perovskite TMOs.
- Supplementary Figure 10.** Ni-based perovskite TMOs as peroxidase mimics.
- Supplementary Figure 11.** Representative SEM images of  $\text{LaCoO}_{3-\delta}$  and  $\text{LaCrO}_3$ .
- Supplementary Figure 12.** Representative TEM images of  $\text{LaCoO}_{3-\delta}$  and  $\text{LaCrO}_3$ .
- Supplementary Figure 13.** PXRD patterns and peroxidase-like activity of  $\text{LaCoO}_{3-\delta}$  and  $\text{LaCrO}_3$ .
- Supplementary Figure 14.** Magnetic measurements for  $\text{LaCoO}_{3-\delta}$  perovskite oxides.
- Supplementary Figure 15.** (a) Mass normalized peroxidase-like activities of perovskite TMOs. (b) Mass normalized perovskite TMOs' peroxidase-like activities as a function of  $e_g$  occupancy.
- Supplementary Figure 16.** Evaluation of relationship between oxidation state and peroxidase-like activity of perovskites.
- Supplementary Figure 17.** Evaluation of relationship between  $3d$ -electron number of B-site ions and peroxidase-like activity of perovskites.
- Supplementary Figure 18.** Evaluation of relationship between O  $2p$ -band center and peroxidase-like activity of perovskites.
- Supplementary Figure 19.** Role of B-O covalency on the peroxidase-like activities of perovskite TMOs.
- Supplementary Figure 20.** Structural models for perovskite bulks.
- Supplementary Figure 21.** Structural models for perovskite slabs.
- Supplementary Figure 22.** Comparison between calculated and experimental  $e_g$  values for perovskites.
- Supplementary Figure 23.** Energy profile for the adsorption of  $\text{H}_2\text{O}_2$  to the  $\text{LaNiO}_3$  (001) surface.
- Supplementary Figure 24.** The adsorption energies of  $\text{H}_2\text{O}_2$  plotted as a function of  $e_g$  occupancy.
- Supplementary Figure 25.** Relative energies for intermediates involved in the catalytic reactions proposed in Figure 3a.

**Supplementary Figure 26.** Representative SEM images of binary TMOs. (a, b)  $\text{MnO}_2$ , (c, d)  $\text{Mn}_2\text{O}_{3-\delta}$ , (e, f)  $\text{CoO}$ , (g, h)  $\text{NiO}$ , and (i, j)  $\text{Fe}_2\text{O}_3$ .

**Supplementary Figure 27.** Representative TEM images of binary TMOs. (a, b)  $\text{MnO}_2$ , (c, d)  $\text{Mn}_2\text{O}_{3-\delta}$ , (e, f)  $\text{CoO}$ , (g, h)  $\text{NiO}$ , and (i, j)  $\text{Fe}_2\text{O}_3$ .

**Supplementary Figure 28.** PXRD patterns of (a)  $\text{MnO}_2$ , (b)  $\text{Mn}_2\text{O}_{3-\delta}$ , (c)  $\text{CoO}$ , (d)  $\text{NiO}$ , and (e)  $\text{Fe}_2\text{O}_3$ .

**Supplementary Figure 29.** Kinetic curves of  $A_{652}$  for monitoring the catalytic oxidation of 1 mM TMB with 100 mM  $\text{H}_2\text{O}_2$  in the presence of  $10 \mu\text{g}\cdot\text{mL}^{-1}$   $\text{MnO}_2$ ,  $\text{CoO}$ ,  $\text{Mn}_2\text{O}_{3-\delta}$ ,  $\text{NiO}$ , and  $\text{Fe}_2\text{O}_3$ , respectively.

**Supplementary Figure 30.** Mass normalized peroxidase-like activities of binary TMOs.

**Supplementary Figure 31.** Representative TEM images of other peroxidase mimics reported by references. (a, b)  $\text{Mn}_3\text{O}_4$ , (c, d)  $\text{Fe}_3\text{O}_4$ , (e, f)  $\text{Co}_3\text{O}_4$ , and (g, h)  $\text{Cu}(\text{OH})_2$ .

**Supplementary Figure 32.** Representative TEM images of other peroxidase mimics reported by references. (a, b)  $\text{CuO}$ , (c, d)  $\text{GO-COOH}$ , (e, f)  $\text{SWNT}$ , and (g, h)  $\text{CeO}_2$ .

**Supplementary Figure 33.** Kinetic curves of  $A_{652}$  for monitoring the catalytic oxidation of 1 mM TMB with 100 mM  $\text{H}_2\text{O}_2$  in the presence of  $10 \mu\text{g}\cdot\text{mL}^{-1}$   $\text{LaNiO}_{3-\delta}$  and other typical nanozymes reported by references.

**Supplementary Table 1.** BET surface area of the TMOs (including perovskite TMOs) studied in this work.

**Supplementary Table 2.** ICP-OES analysis of  $\text{LaMn}_{0.5}\text{Ni}_{0.5}\text{O}_3$ ,  $\text{La}_{0.5}\text{Sr}_{0.5}\text{MnO}_3$ , and  $\text{La}_{0.5}\text{Sr}_{0.5}\text{FeO}_3$ .

**Supplementary Table 3.** Oxygen vacancy ( $\delta$ ), oxidation state of B site, and nominal  $e_g$  occupancy.

**Supplementary Table 4.** Transition metal's valence, spin state, and assignment of  $e_g$  electron occupancy for the TMOs (including perovskite TMOs).

**Supplementary Table 5.** BET surface area of other nanomaterials studied in this work.

**Supplementary Table 6.** Effective magnetic moment ( $\mu_{\text{eff}}$ ) and  $e_g$  occupancy for different spin states of cobalt ion in  $\text{LaCoO}_{3-\delta}$ .

**Supplementary Table 7.** Comparison of literature results and ours on the peroxidase-like activities of several binary TMOs.

**Supplementary Table 8.** Kinetics parameters of TMOs as well as other representative nanozymes.

**Supplementary Table 9.** The ground state magnetic orderings, space groups, and lattice parameters for  $\text{ABO}_3$  perovskites obtained by calculations with the corresponding references.

**Supplementary Table 10.** Collection of the  $U_{\text{eff}}$  values for  $d$  orbitals of transition metals.

**Supplementary Notes.**

**Supplementary Methods.**

**Supplementary References.**

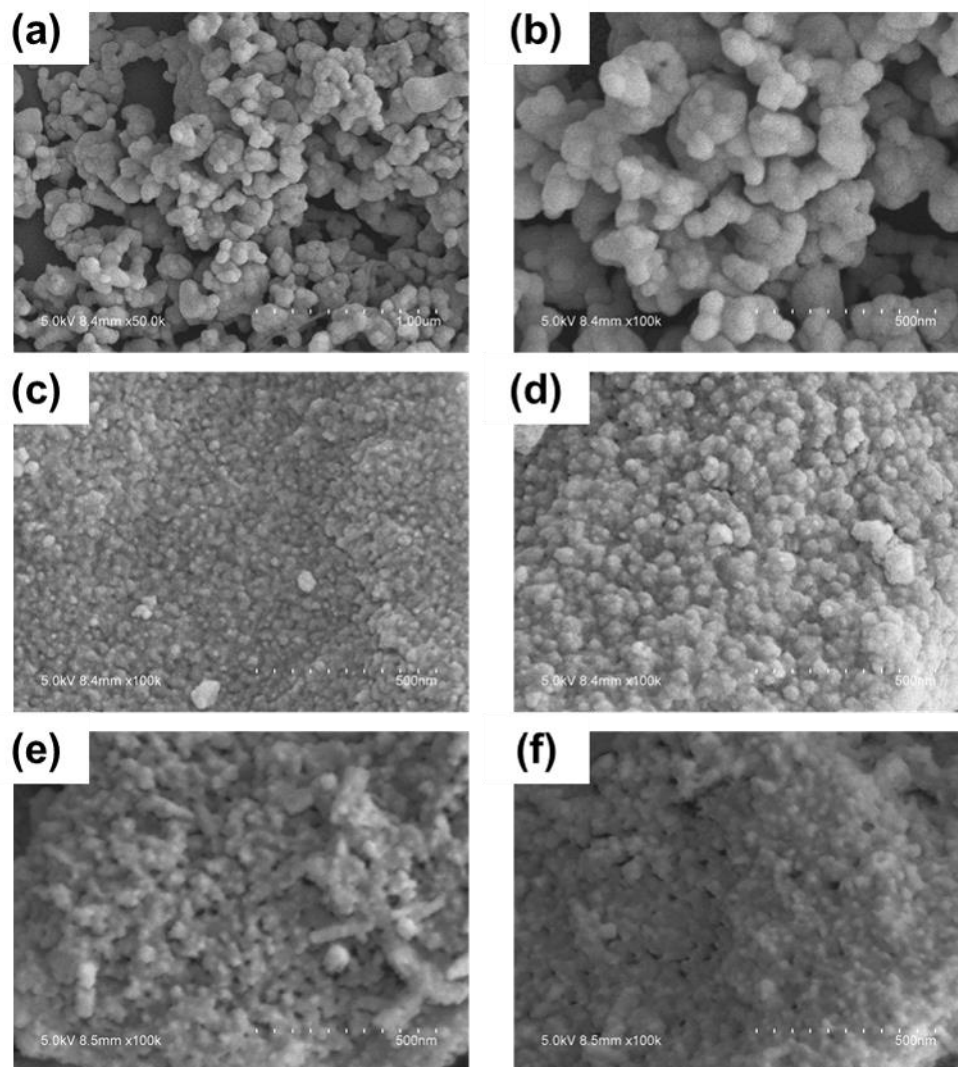

**Supplementary Figure 1.** Representative SEM images of (a, b) LaFeO<sub>3</sub>, (c, d) La<sub>0.5</sub>Sr<sub>0.5</sub>FeO<sub>3-δ</sub>, and (e, f) SrFeO<sub>3-δ</sub>. Source data are provided as a Source Data file.

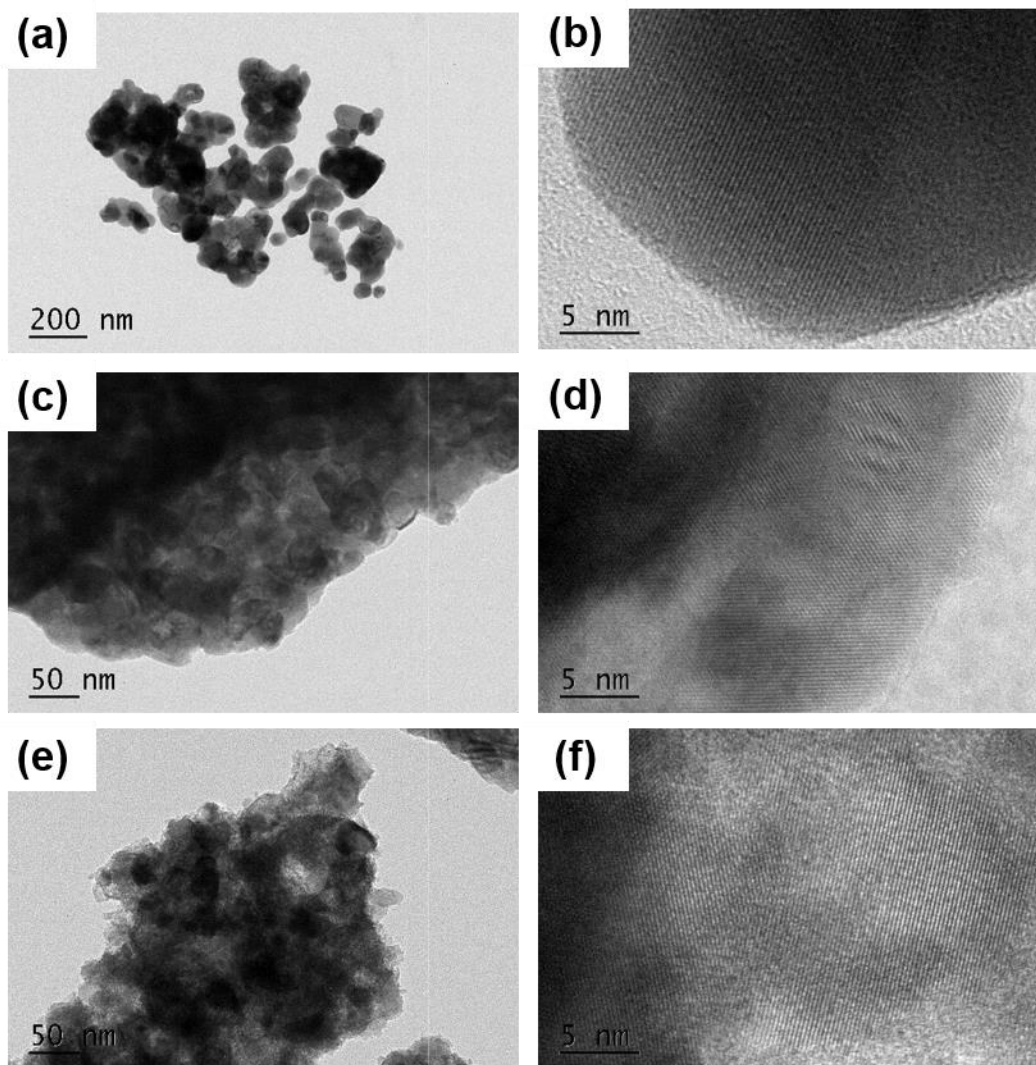

**Supplementary Figure 2.** Representative TEM images of (a, b)  $\text{LaFeO}_3$ , (c, d)  $\text{La}_{0.5}\text{Sr}_{0.5}\text{FeO}_{3-\delta}$ , and (e, f)  $\text{SrFeO}_{3-\delta}$ . Source data are provided as a Source Data file.

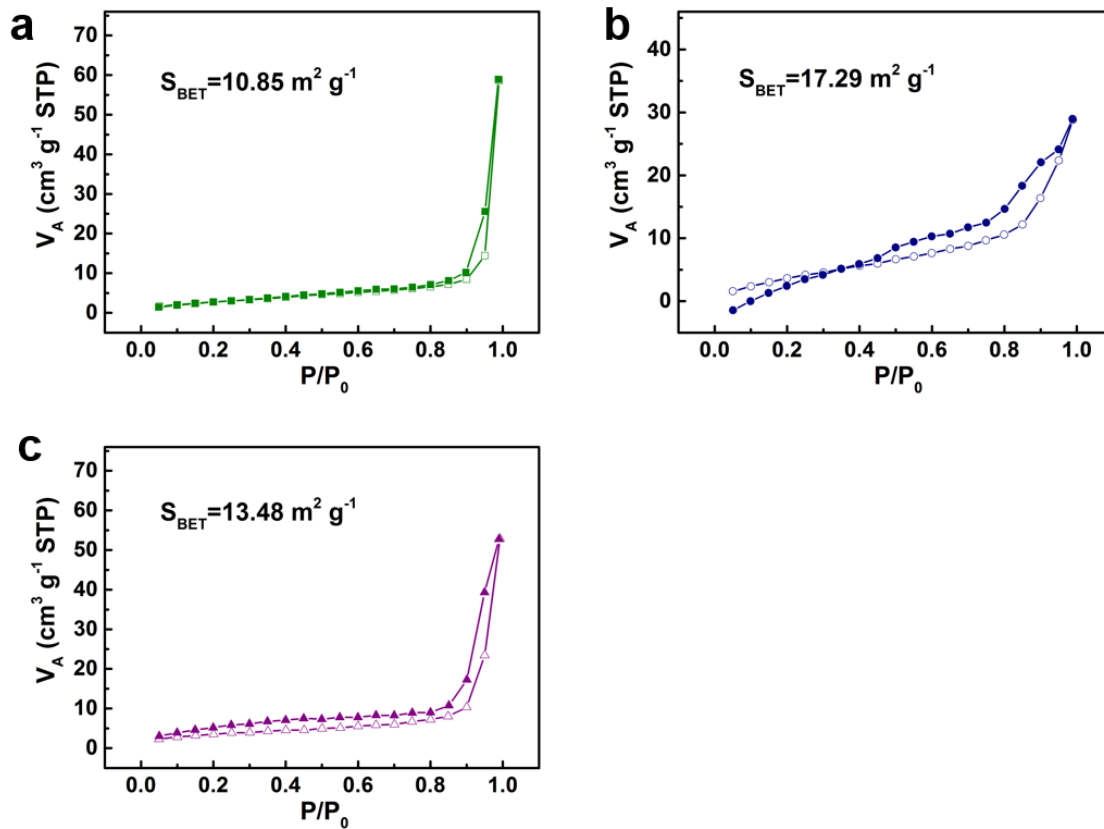

**Supplementary Figure 3.** Nitrogen adsorption-desorption isotherm curves for (a)  $\text{LaFeO}_3$ , (b)  $\text{La}_{0.5}\text{Sr}_{0.5}\text{FeO}_{3-\delta}$ , and (c)  $\text{SrFeO}_{3-\delta}$ . Source data are provided as a Source Data file.

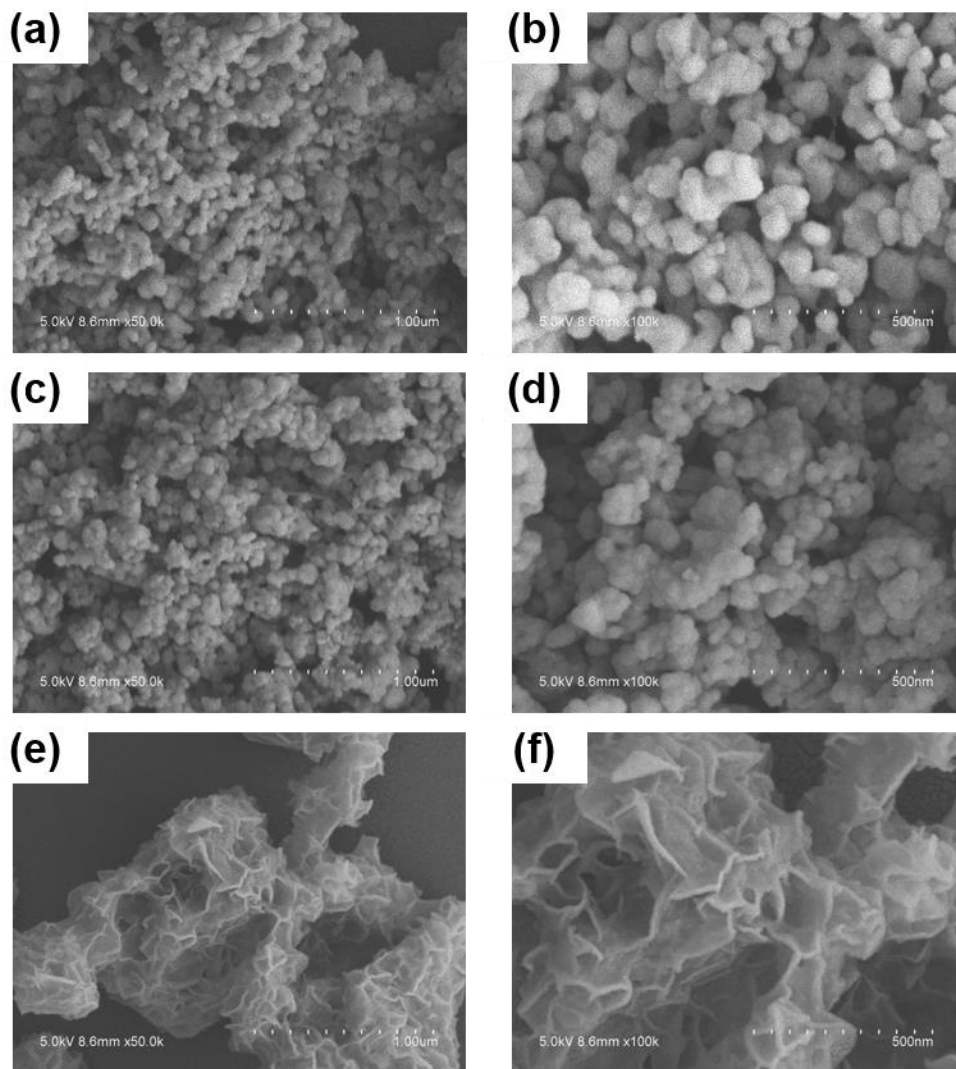

**Supplementary Figure 4.** Representative SEM images of (a, b) LaMnO<sub>3-δ</sub>, (c, d) La<sub>0.5</sub>Sr<sub>0.5</sub>MnO<sub>3-δ</sub>, and (e, f) CaMnO<sub>3-δ</sub>. Source data are provided as a Source Data file.

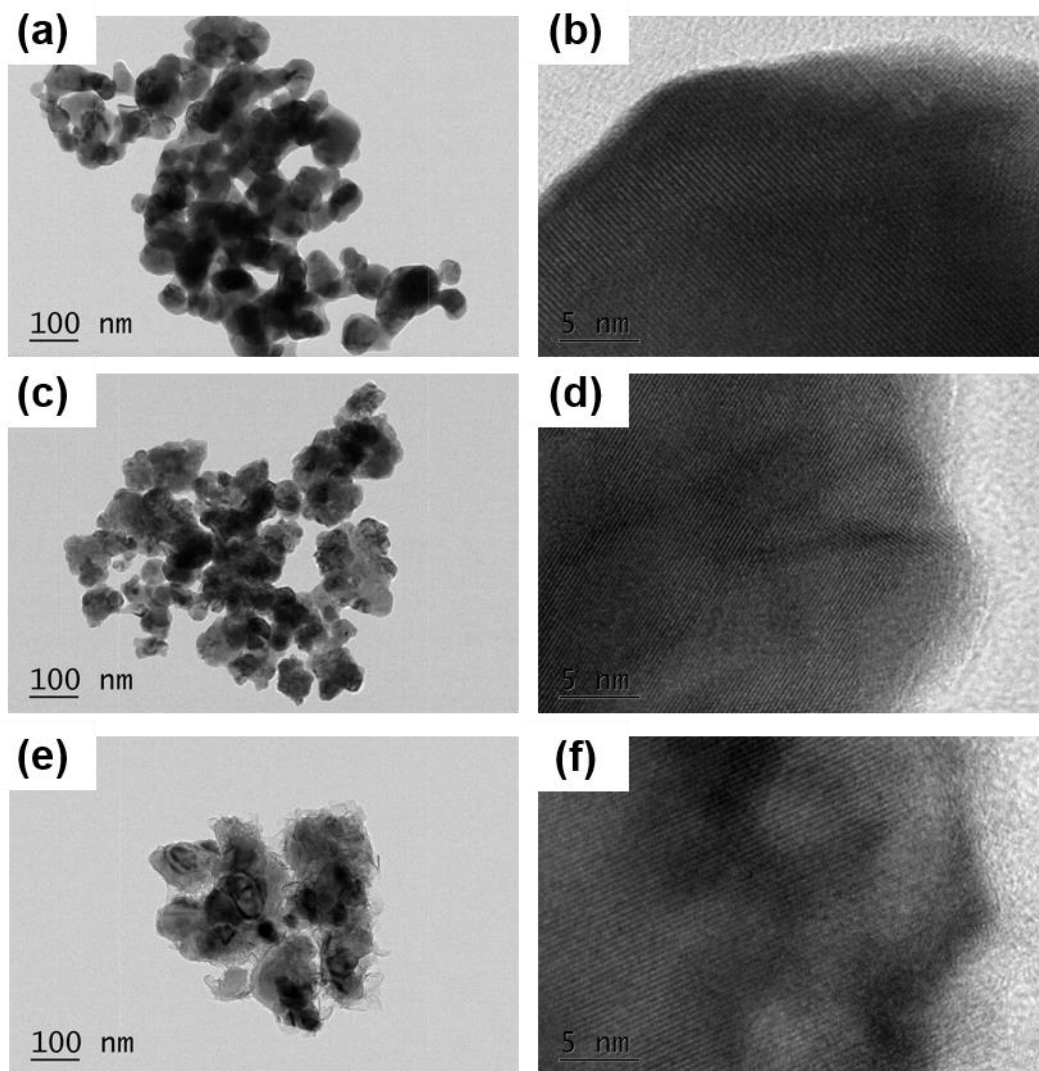

**Supplementary Figure 5.** Representative TEM images of (a, b) LaMnO<sub>3-δ</sub>, (c, d) La<sub>0.5</sub>Sr<sub>0.5</sub>MnO<sub>3-δ</sub>, and (e, f) CaMnO<sub>3-δ</sub>. Source data are provided as a Source Data file.



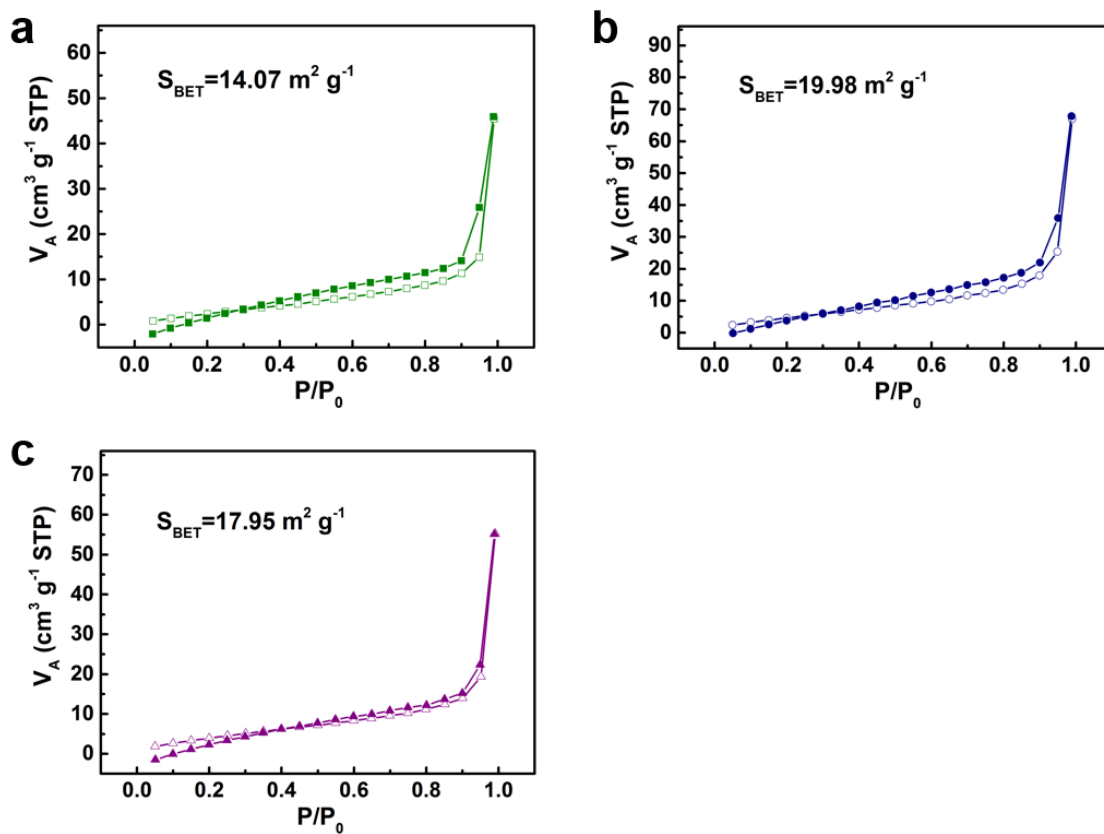

**Supplementary Figure 6.** Nitrogen adsorption-desorption isotherm curves for (a)  $\text{LaMnO}_{3-\delta}$ , (b)  $\text{La}_{0.5}\text{Sr}_{0.5}\text{MnO}_{3-\delta}$ , and (c)  $\text{CaMnO}_{3-\delta}$ . Source data are provided as a Source Data file.

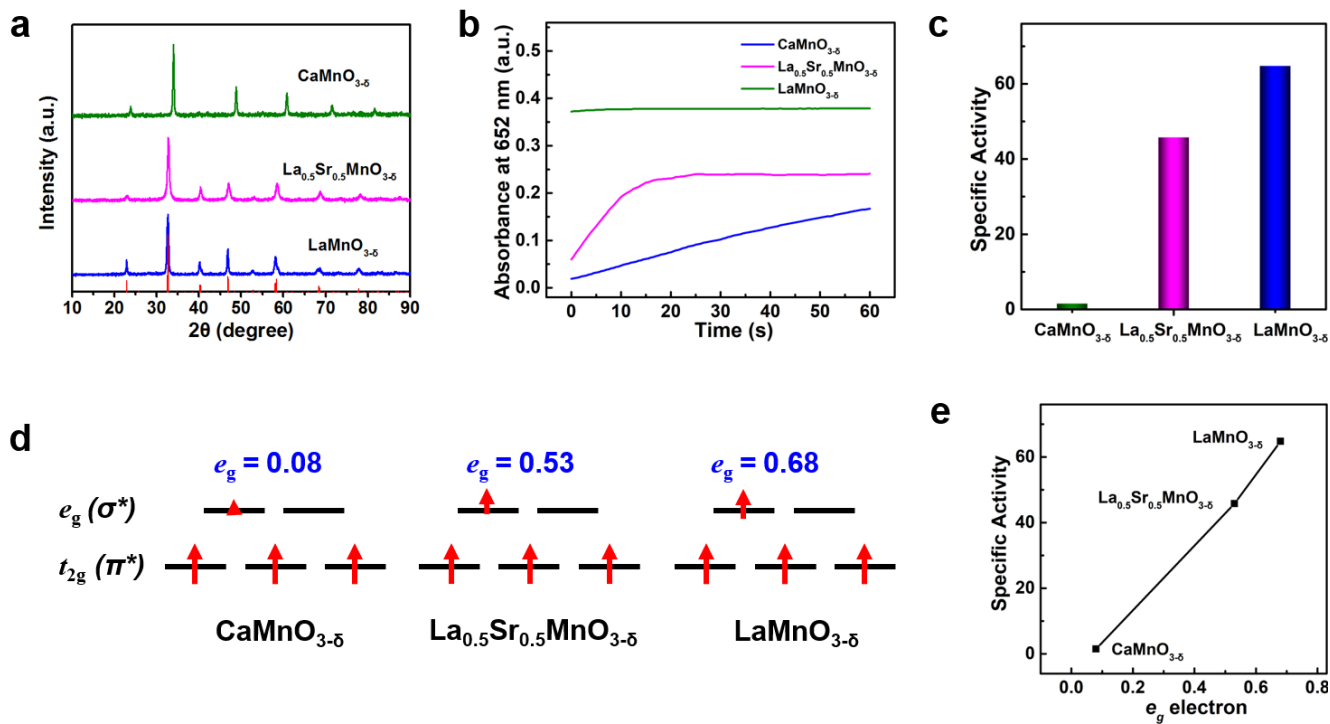

**Supplementary Figure 7.** Mn-based perovskite TMOs as peroxidase mimics. (a) PXR patterns of  $\text{CaMnO}_{3-\delta}$ ,  $\text{La}_{0.5}\text{Sr}_{0.5}\text{MnO}_{3-\delta}$ , and  $\text{LaMnO}_{3-\delta}$  (the red lines at the bottom mark the reference pattern of  $\text{LaMnO}_3$  from the JCPDS database, card No. 89-2470). (b) Kinetic curves of  $A_{652}$  for monitoring the catalytic oxidation of 1 mM TMB with 100 mM  $\text{H}_2\text{O}_2$  in the presence of  $10 \mu\text{g}\cdot\text{mL}^{-1}$   $\text{CaMnO}_{3-\delta}$ ,  $\text{La}_{0.5}\text{Sr}_{0.5}\text{MnO}_{3-\delta}$ , and  $\text{LaMnO}_{3-\delta}$ , respectively. (c) Surface area normalized peroxidase-like activities of  $\text{CaMnO}_{3-\delta}$ ,  $\text{La}_{0.5}\text{Sr}_{0.5}\text{MnO}_{3-\delta}$ , and  $\text{LaMnO}_{3-\delta}$ . (d) Transition metal's  $3d$  electron occupancy of  $\text{CaMnO}_{3-\delta}$ ,  $\text{La}_{0.5}\text{Sr}_{0.5}\text{MnO}_{3-\delta}$ , and  $\text{LaMnO}_{3-\delta}$  in split  $t_{2g}$  ( $\pi^*$ ) and  $e_g$  ( $\sigma^*$ ) antibonding orbitals. (e) Surface area normalized peroxidase-like activities of Mn contained perovskite TMOs as a function of  $e_g$  occupancy. Source data are provided as a Source Data file.

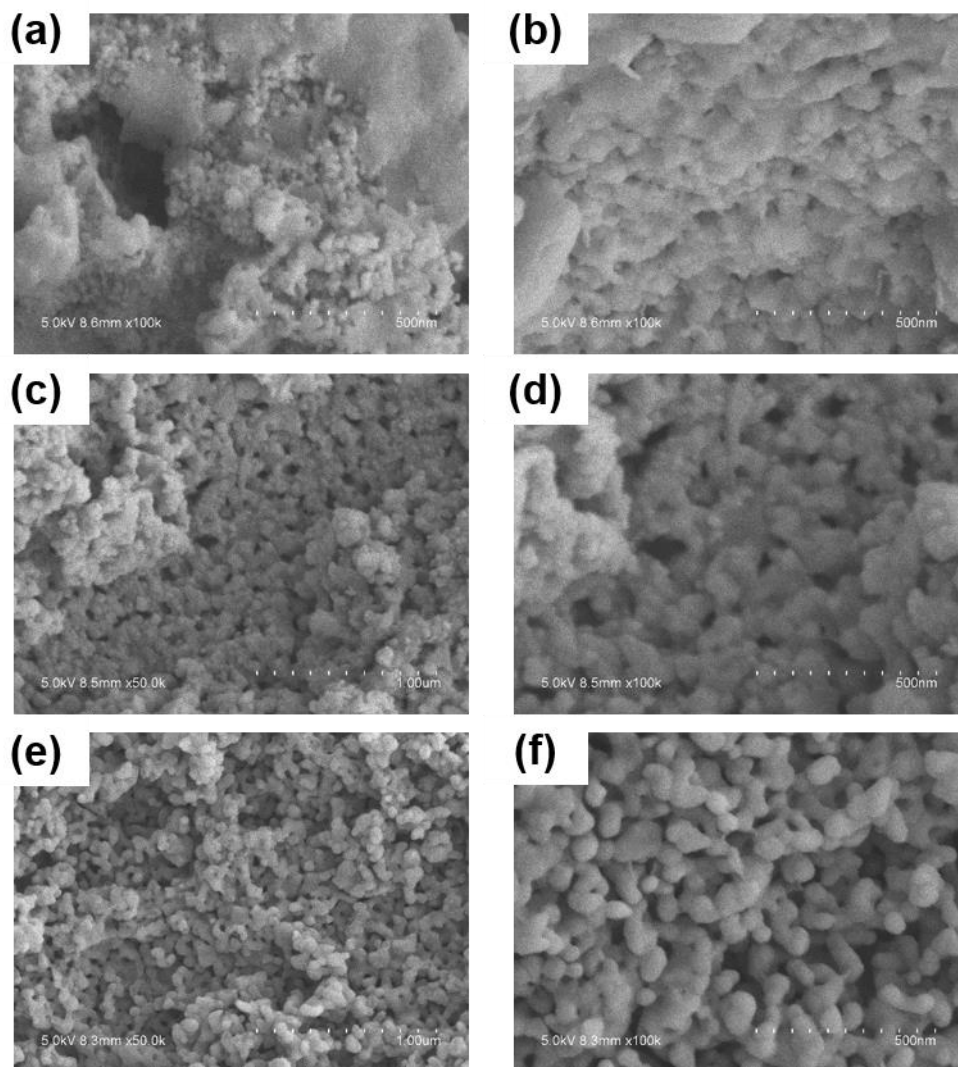

**Supplementary Figure 8.** Representative SEM images of nickel contained perovskite TMOs. (a, b) LaNiO<sub>3-δ</sub>, (c, d) LaNiO<sub>3-δ</sub>-H<sub>2</sub>, and (e, f) LaMn<sub>0.5</sub>Ni<sub>0.5</sub>O<sub>3</sub>. Source data are provided as a Source Data file.

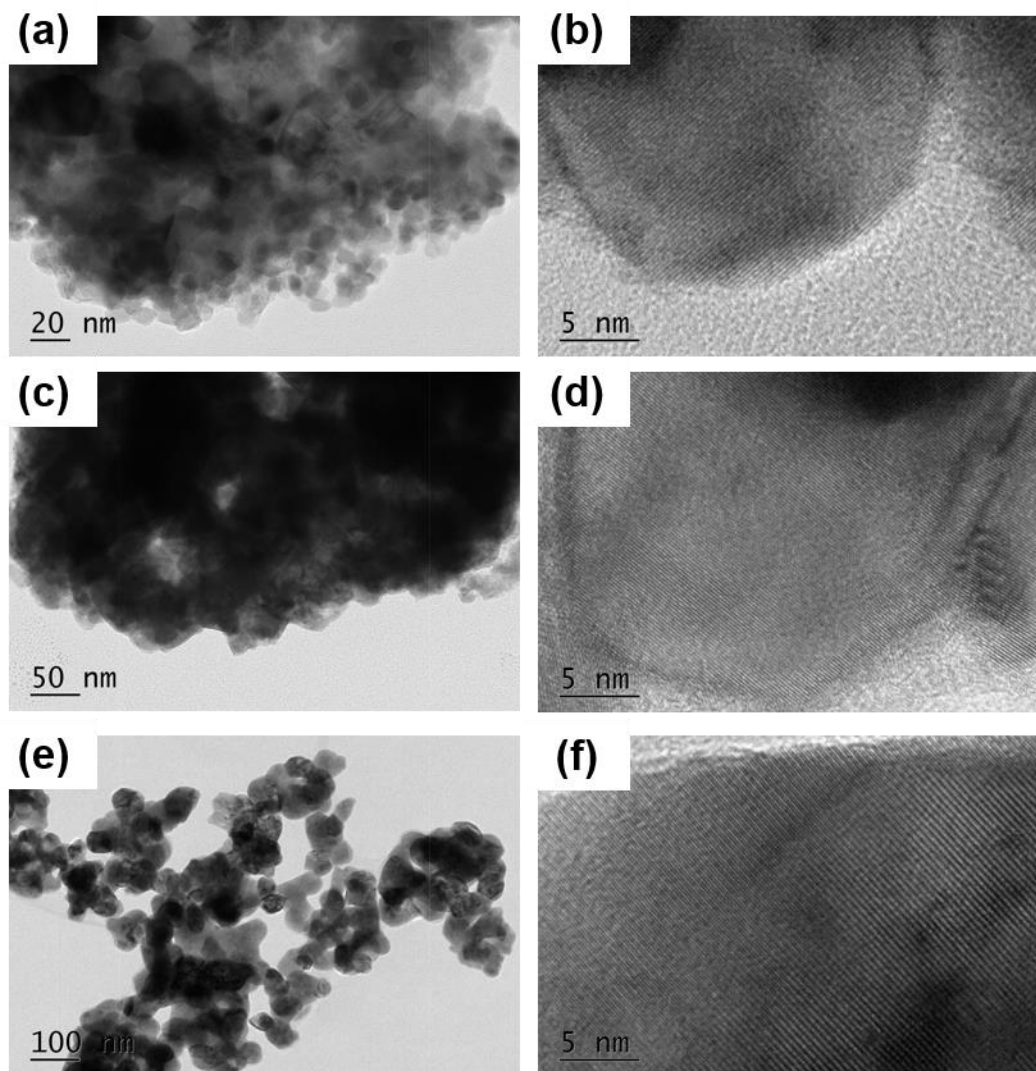

**Supplementary Figure 9.** Representative TEM images of nickel contained perovskite TMOs. (a, b)  $\text{LaNiO}_{3-\delta}$ , (c, d)  $\text{LaNiO}_{3-\delta-\text{H}_2}$ , and (e, f)  $\text{LaMn}_{0.5}\text{Ni}_{0.5}\text{O}_3$ . Source data are provided as a Source Data file.

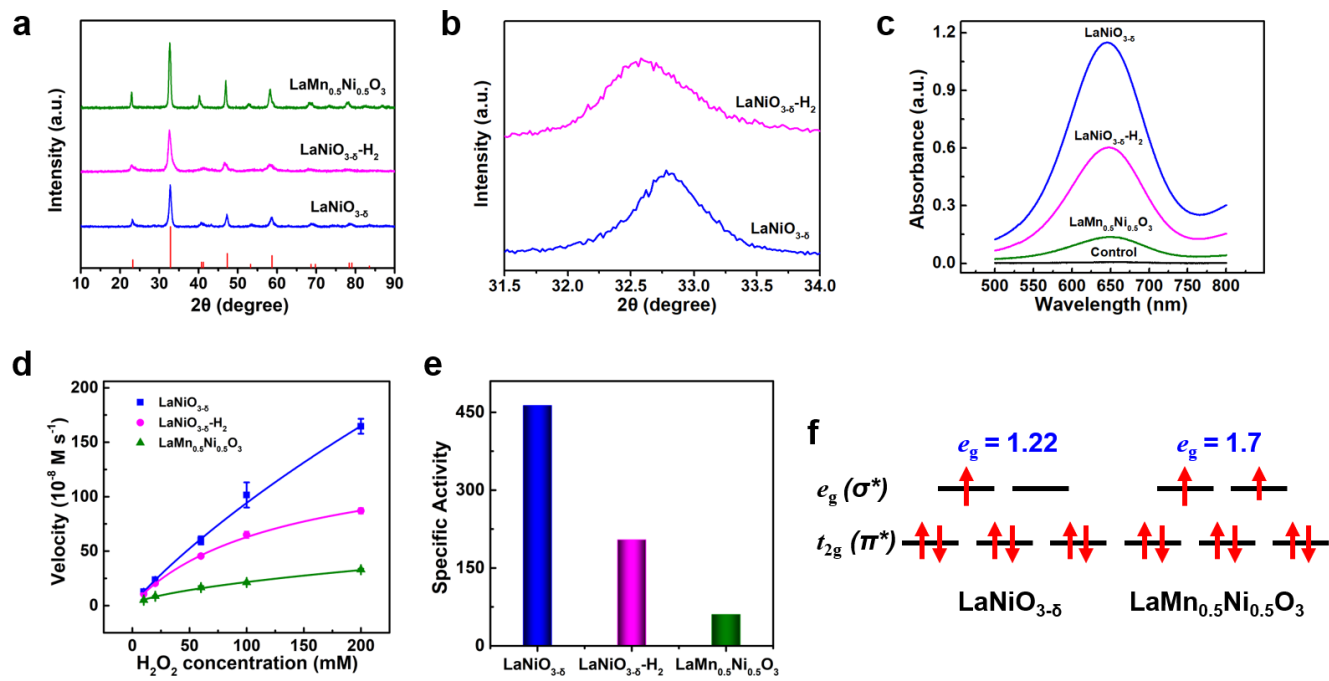

**Supplementary Figure 10.** Ni-based perovskite TMOs as peroxidase mimics. (a) Powder X-ray diffraction (PXRD) patterns of  $\text{LaNiO}_{3-\delta}$ ,  $\text{LaNiO}_{3-\delta}\text{-H}_2$ , and  $\text{LaMn}_{0.5}\text{Ni}_{0.5}\text{O}_3$  (the red lines at the bottom mark the reference pattern of  $\text{LaNiO}_3$  from the JCPDS database, card No. 34-1181). (b) PXRD patterns of  $\text{LaNiO}_{3-\delta}$  and  $\text{LaNiO}_{3-\delta}\text{-H}_2$  in the region of  $2\theta = 31.5\text{-}34^\circ$ . (c) Typical absorption spectra of 0.8 mM TMB catalytically oxidized by  $10 \mu\text{g}\cdot\text{mL}^{-1}$  nanozymes (*i.e.*, Control,  $\text{LaNiO}_{3-\delta}$ ,  $\text{LaNiO}_{3-\delta}\text{-H}_2$ , and  $\text{LaMn}_{0.5}\text{Ni}_{0.5}\text{O}_3$ ) in the presence of 50 mM  $\text{H}_2\text{O}_2$  in pH 4.5 acetate buffer at  $40^\circ\text{C}$ . (d) Michaelis-Menten plots with varying concentration of  $\text{H}_2\text{O}_2$  for  $\text{LaNiO}_{3-\delta}$ ,  $\text{LaNiO}_{3-\delta}\text{-H}_2$ , and  $\text{LaMn}_{0.5}\text{Ni}_{0.5}\text{O}_3$ , respectively. (e) Surface area normalized peroxidase-like activities of  $\text{LaNiO}_{3-\delta}$ ,  $\text{LaNiO}_{3-\delta}\text{-H}_2$ , and  $\text{LaMn}_{0.5}\text{Ni}_{0.5}\text{O}_3$ . (f) Transition metal's 3d electron occupancy of  $\text{LaNiO}_{3-\delta}$  and  $\text{LaMn}_{0.5}\text{Ni}_{0.5}\text{O}_3$  in split  $t_{2g}$  ( $\pi^*$ ) and  $e_g$  ( $\sigma^*$ ) antibonding orbitals. Source data are provided as a Source Data file.

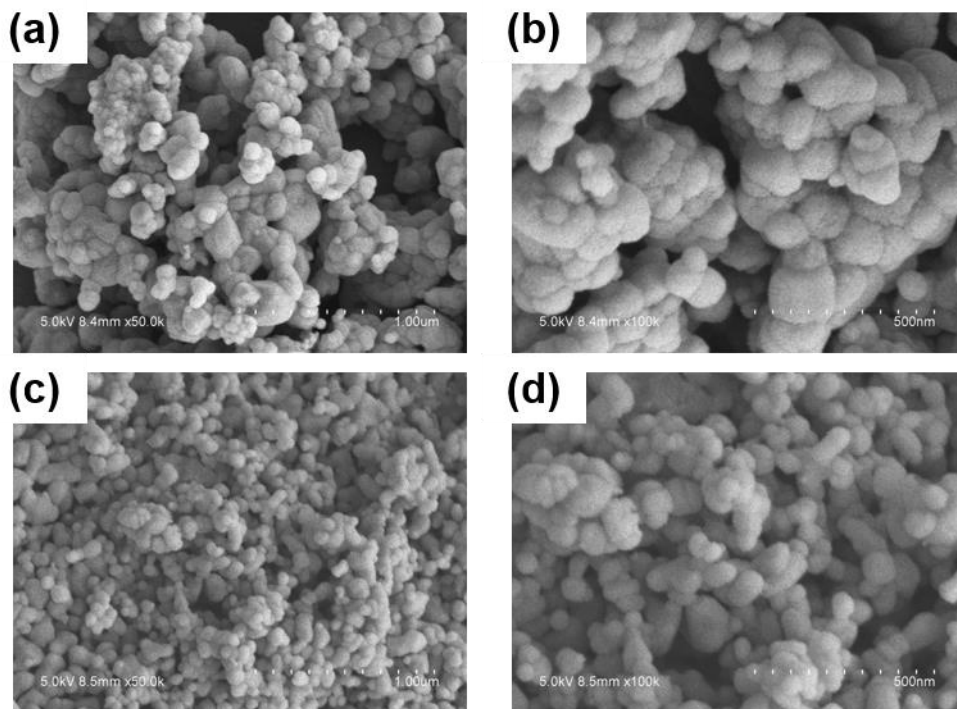

**Supplementary Figure 11.** Representative SEM images of (a, b)  $\text{LaCoO}_{3-\delta}$  and (c, d)  $\text{LaCrO}_3$ . Source data are provided as a Source Data file.

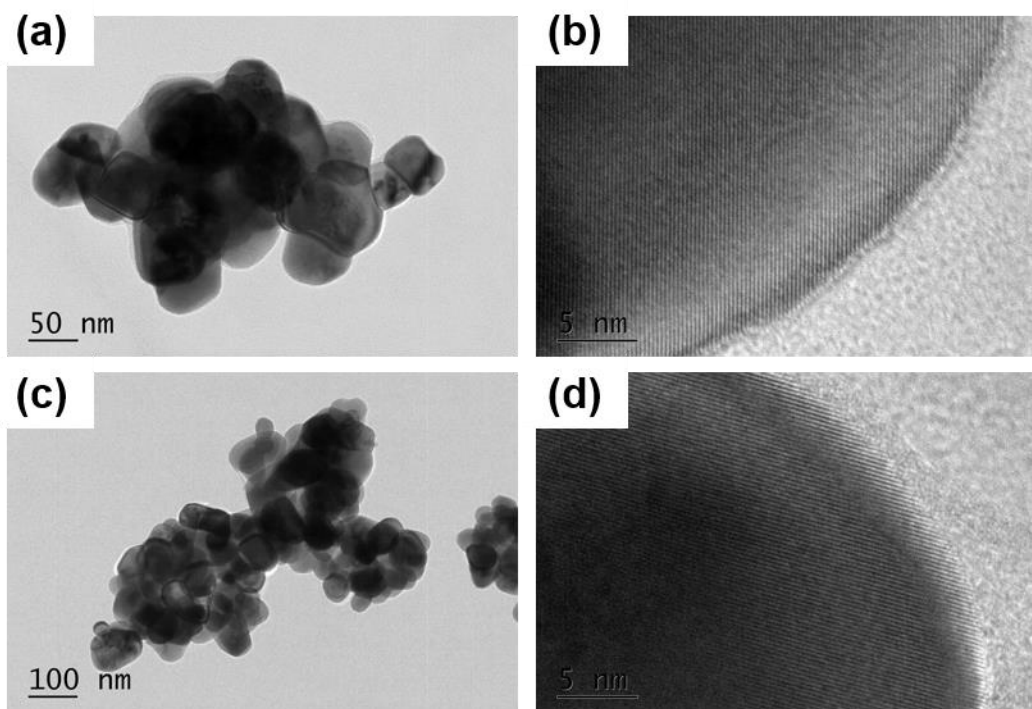

**Supplementary Figure 12.** Representative TEM images of (a, b) LaCoO<sub>3-δ</sub> and (c, d) LaCrO<sub>3</sub>. Source data are provided as a Source Data file.

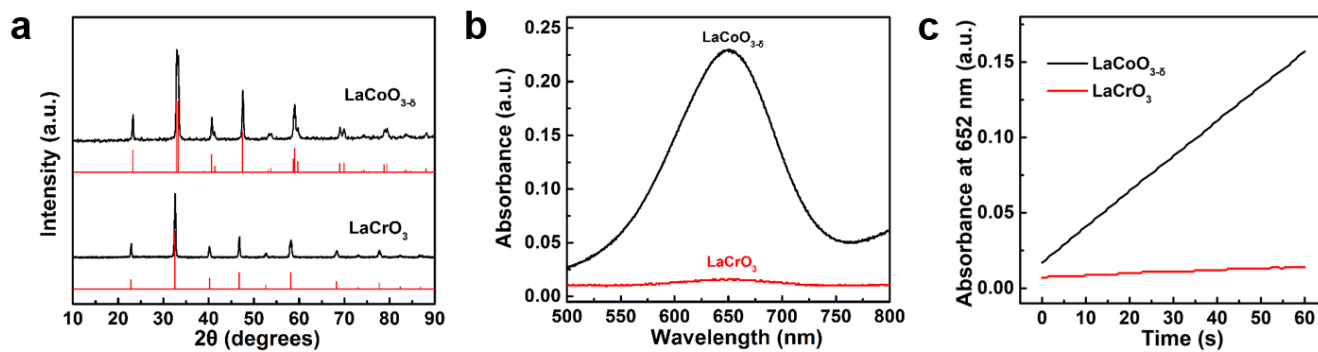

**Supplementary Figure 13.** (a) PXRD patterns of LaCoO<sub>3.5</sub> and LaCrO<sub>3</sub> (Red curve: reference patterns of LaCoO<sub>3</sub> and LaCrO<sub>3</sub> from the JCPDS database, card No. 84-0848 and 75-0441). (b) Typical absorption spectra of 0.8 mM TMB catalytically oxidized by 10 μg·mL<sup>-1</sup> nanozymes (*i.e.*, LaCoO<sub>3.5</sub> and LaCrO<sub>3</sub>) in the presence of 50 mM H<sub>2</sub>O<sub>2</sub> in pH 4.5 acetate buffer at 40 °C. (c) Kinetic curves of A<sub>652</sub> for monitoring the catalytic oxidation of 1 mM TMB with 100 mM H<sub>2</sub>O<sub>2</sub> in the presence of 10 μg·mL<sup>-1</sup> LaCoO<sub>3.5</sub> and LaCrO<sub>3</sub>. Source data are provided as a Source Data file.



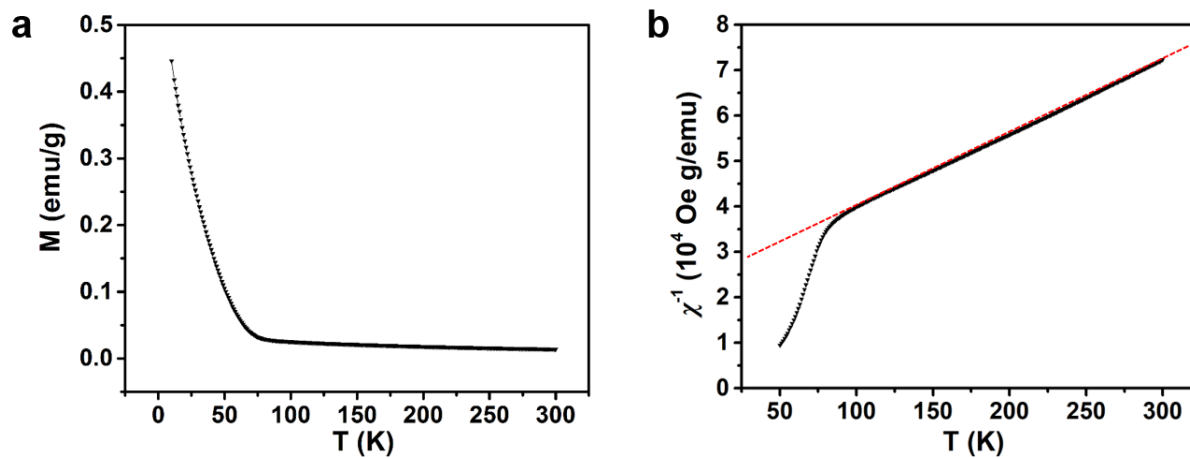

**Supplementary Figure 14. Magnetic measurements for  $\text{LaCoO}_{3-\delta}$  perovskite oxides.** The temperature dependent magnetization (a) and inverse susceptibilities (b) under  $H = 1$  kOe for  $\text{LaCoO}_{3-\delta}$  nanoparticles. The dotted lines showed the fitting result by a Curie-Weiss law. Source data are provided as a Source Data file.

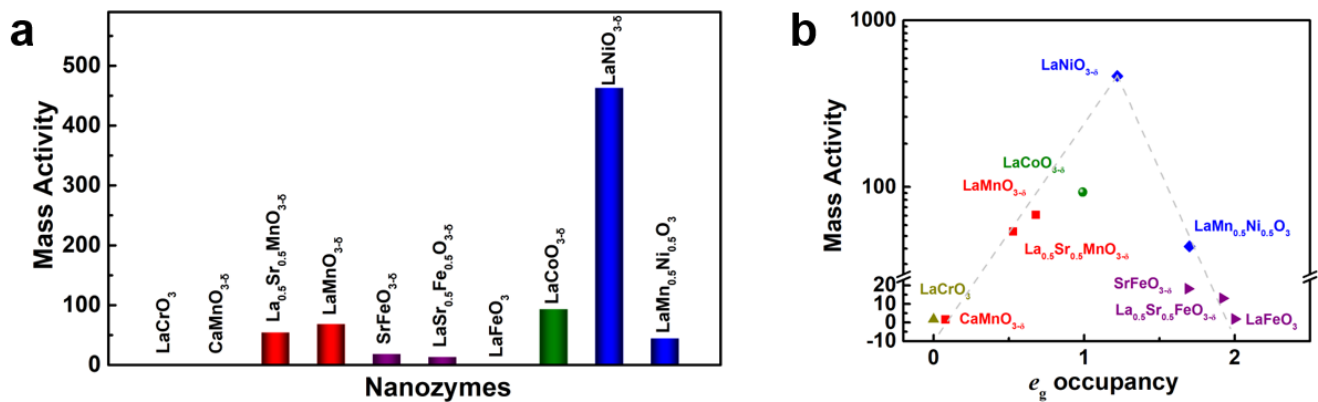

**Supplementary Figure 15.** (a) Mass normalized peroxidase-like activities of perovskite TMOs. (b) Mass normalized perovskite TMOs' peroxidase-like activities as a function of  $e_g$  occupancy. Source data are provided as a Source Data file.

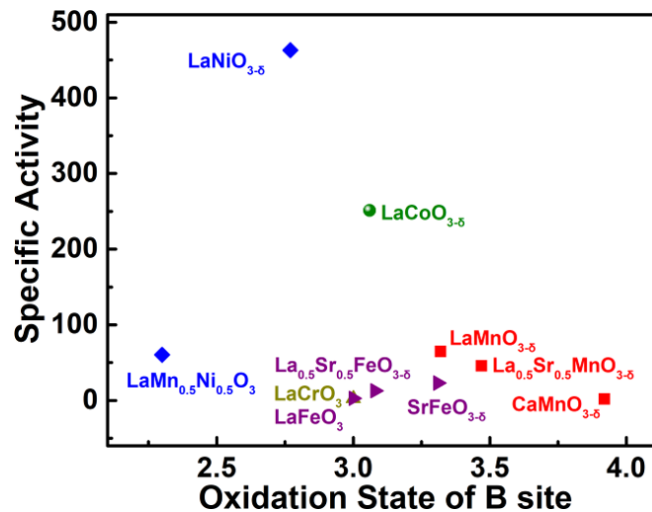

**Supplementary Figure 16. Evaluation of relationship between oxidation state and peroxidase-like activity of perovskites.** Specific peroxidase-like activities of perovskite TMOs versus oxidation station of B site metal ions. Source data are provided as a Source Data file.

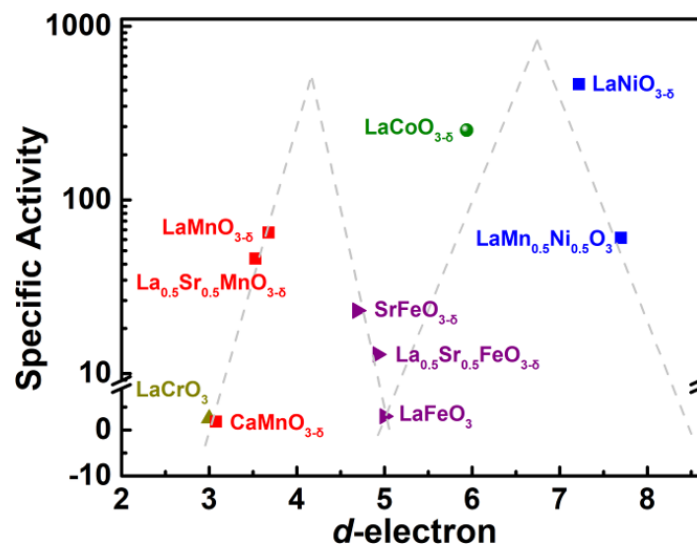

Supplementary Figure 17. Evaluation of relationship between 3d-electron number of B-site ions and peroxidase-like activity of perovskites. Specific peroxidase-like activities of perovskite TMOs versus 3d-electron number of B-site ions. Source data are provided as a Source Data file.

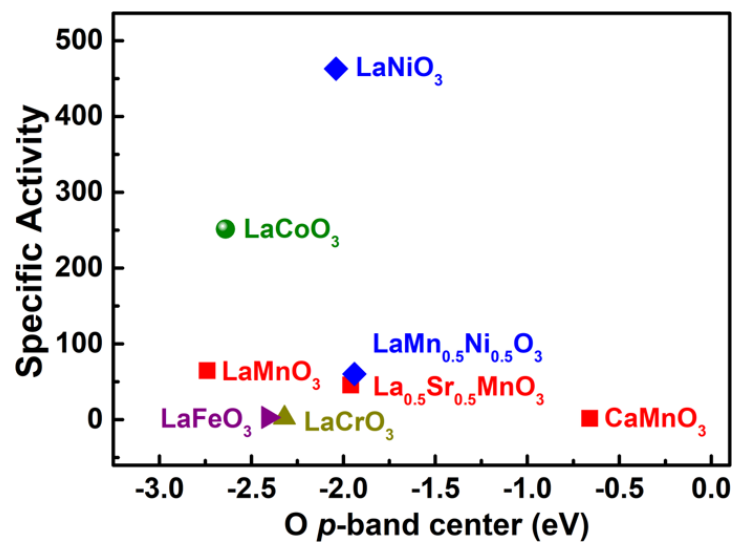

**Supplementary Figure 18. Evaluation of relationship between O *2p*-band center and peroxidase-like activity of perovskites.** Experimentally specific peroxidase-like activities of perovskite TMOs plotted as a function of the calculated bulk O *2p*-band center. Source data are provided as a Source Data file.

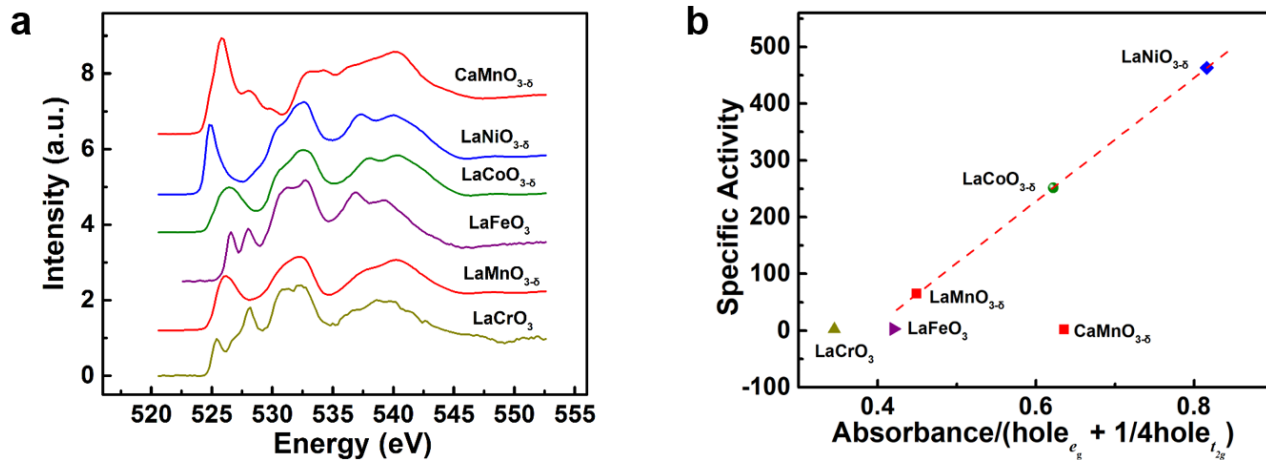

**Supplementary Figure 19. Role of B-O covalency on the peroxidase-like activities of perovskite TMOs.** (a) O K-edge XAS of  $\text{LaCrO}_3$ ,  $\text{LaMnO}_{3-\delta}$ ,  $\text{LaFeO}_3$ ,  $\text{LaCoO}_{3-\delta}$ ,  $\text{LaNiO}_{3-\delta}$ , and  $\text{CaMnO}_{3-\delta}$ . (b) Specific peroxidase-like activities of perovskite TMOs plotted as a function of B-O covalency. The line is shown for eye-guiding only. Source data are provided as a Source Data file.

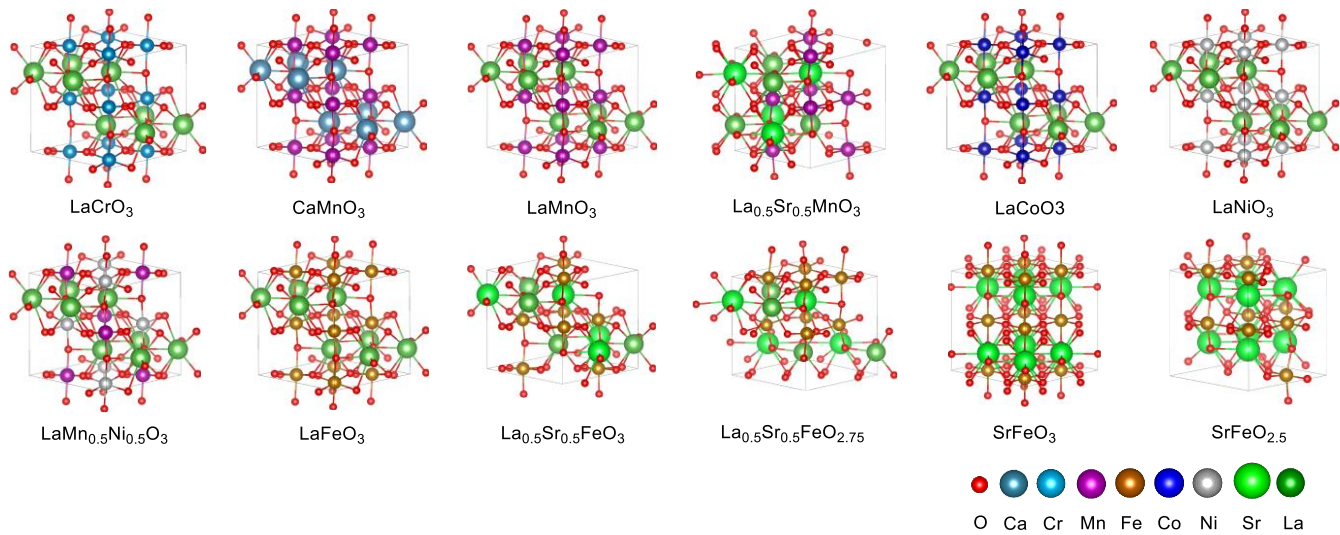

**Supplementary Figure 20. Structural models for perovskite bulks.**

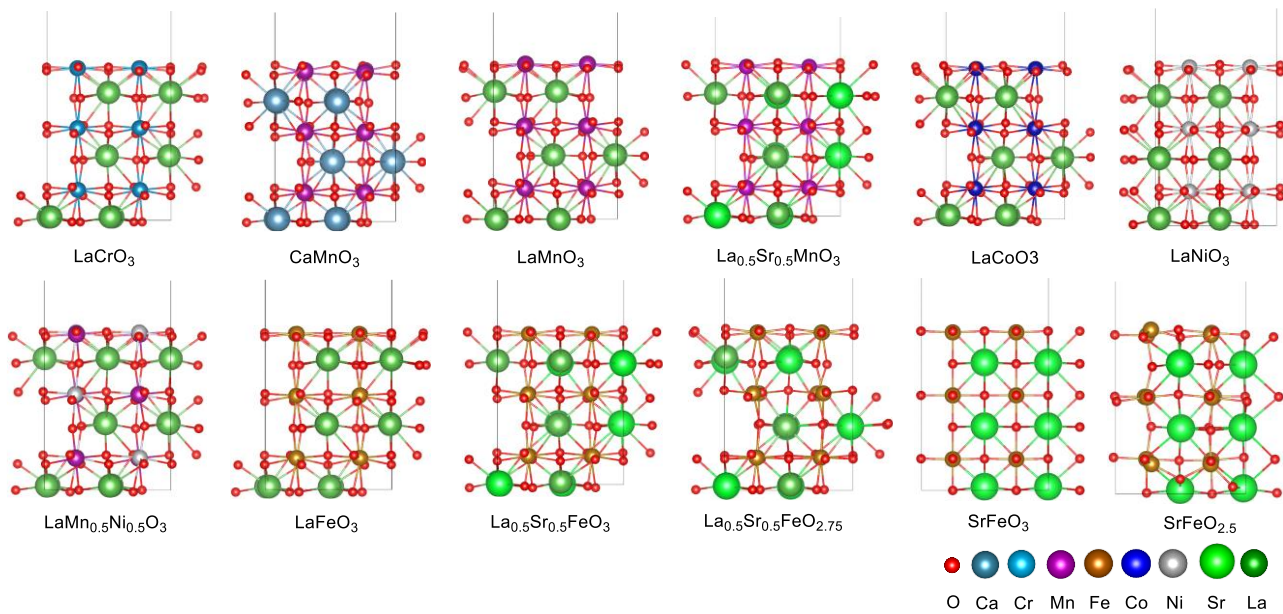

**Supplementary Figure 21. Structural models for perovskite slabs.**



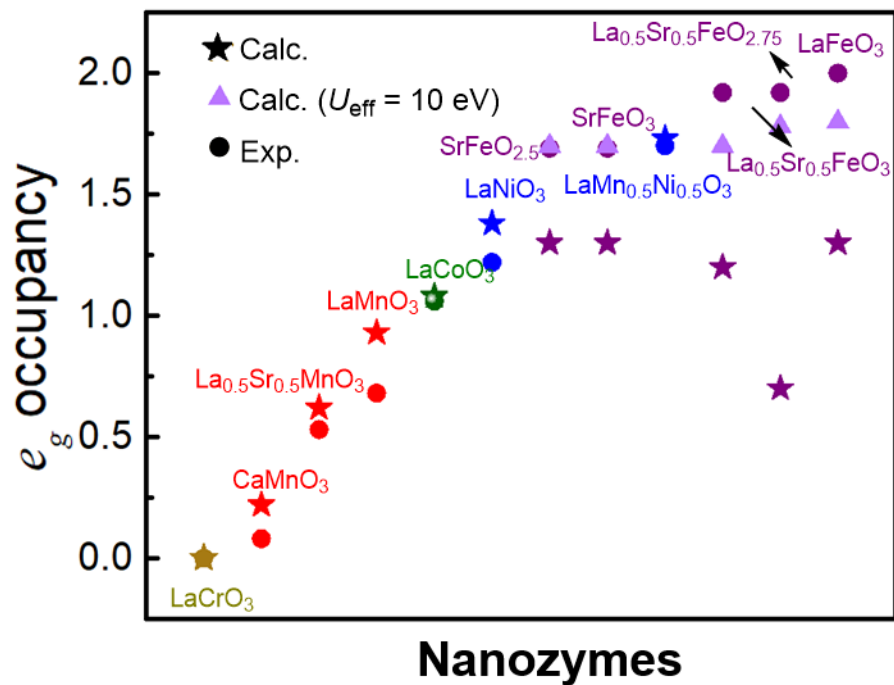

**Supplementary Figure 22. Comparison between calculated and experimental  $e_g$  values for perovskites.** Both sets of  $e_g$  values agree well with each other, except for perovskites containing irons. Calculations with  $U_{\text{eff}} = 10.0 \text{ eV}$  for Fe  $3d$  orbitals make the calculated and experimental  $e_g$  values for iron containing perovskites more consistent. Source data are provided as a Source Data file.

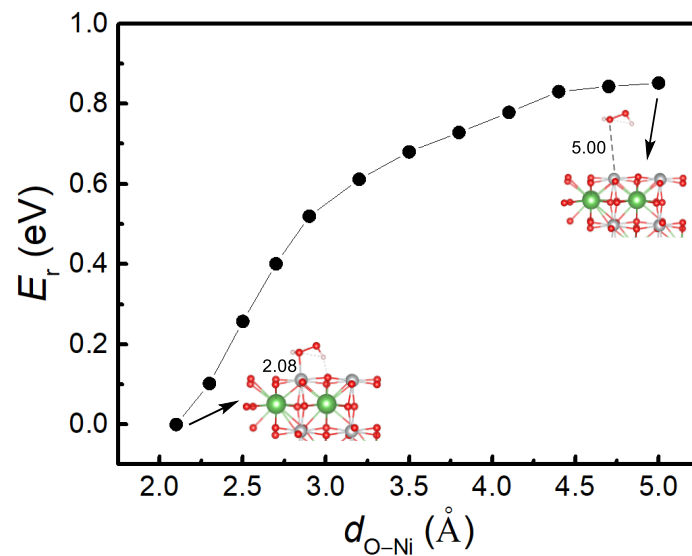

**Supplementary Figure 23. Energy profile for the adsorption of  $\text{H}_2\text{O}_2$  to the  $\text{LaNiO}_3$  (001) surface.** The energy of each point (adsorption structure) was calculated by geometry optimization with some geometric parameters constrained. Source data are provided as a Source Data file.

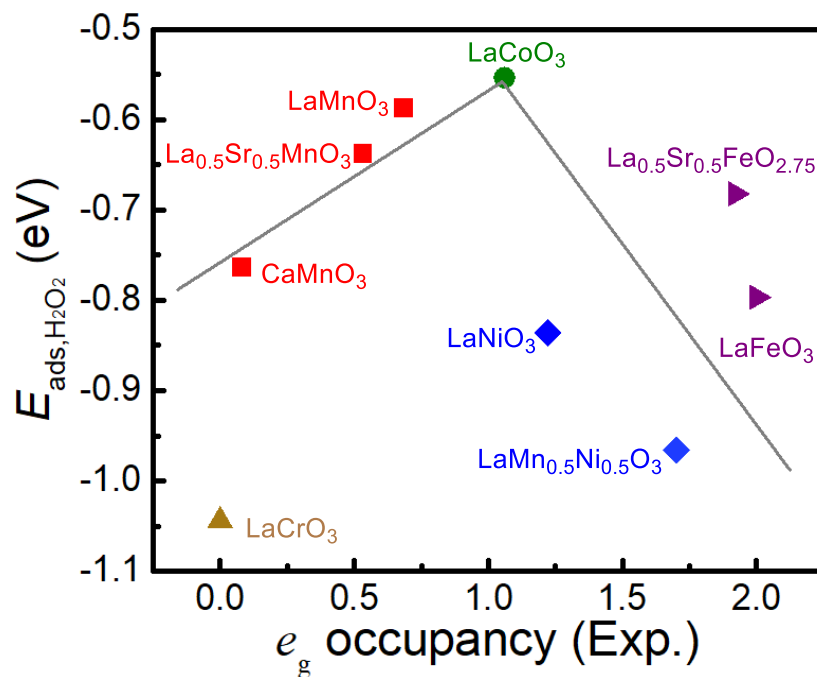

**Supplementary Figure 24.** The adsorption energies of H<sub>2</sub>O<sub>2</sub> plotted as a function of  $e_g$  occupancy. Source data are provided as a Source Data file.

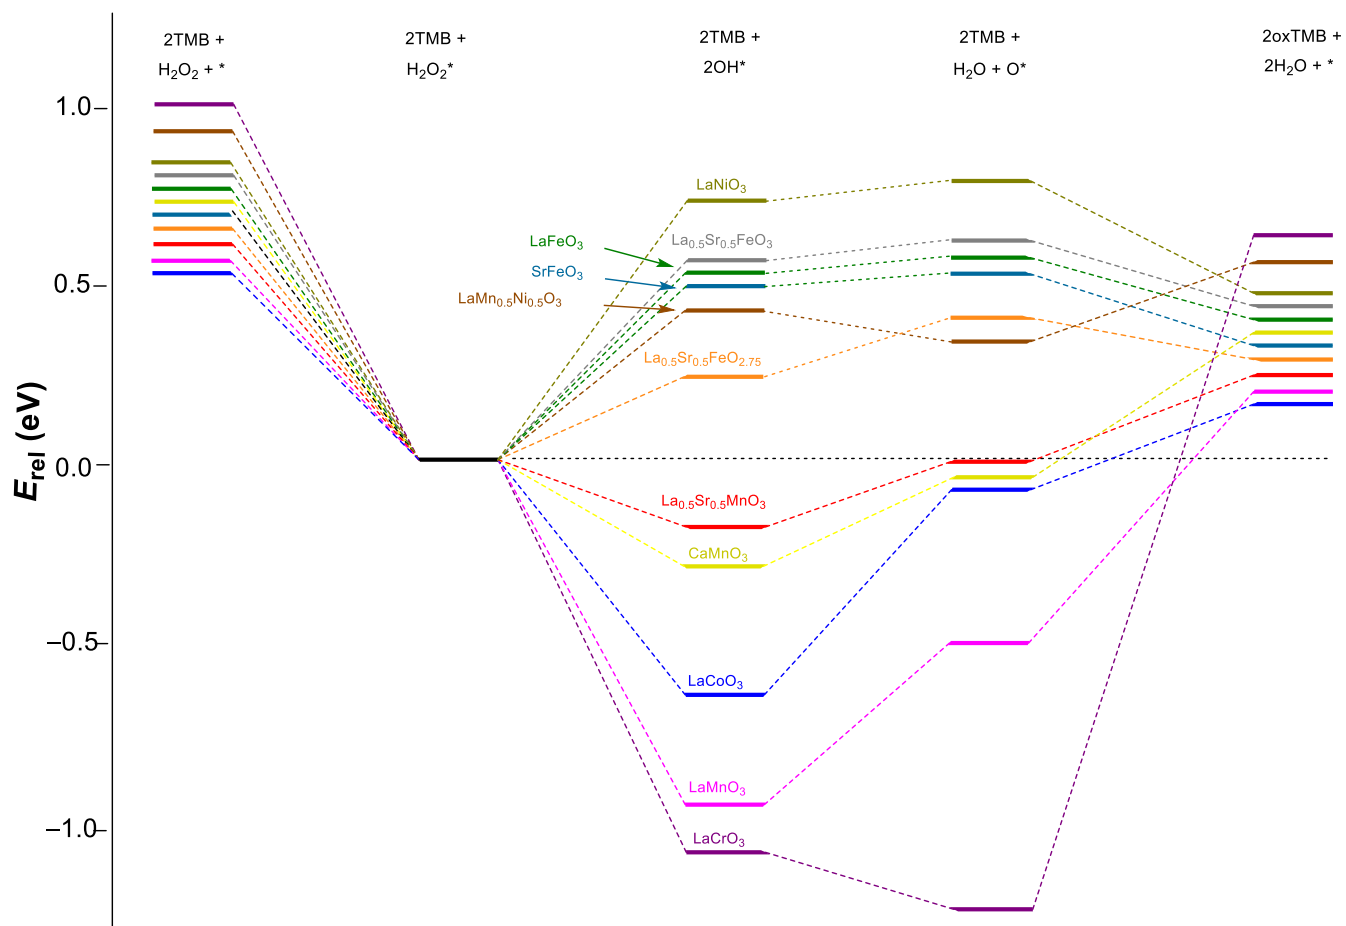

**Supplementary Figure 25.** Relative energies for intermediates involved in the catalytic reactions proposed in Figure 3a. Source data are provided as a Source Data file.

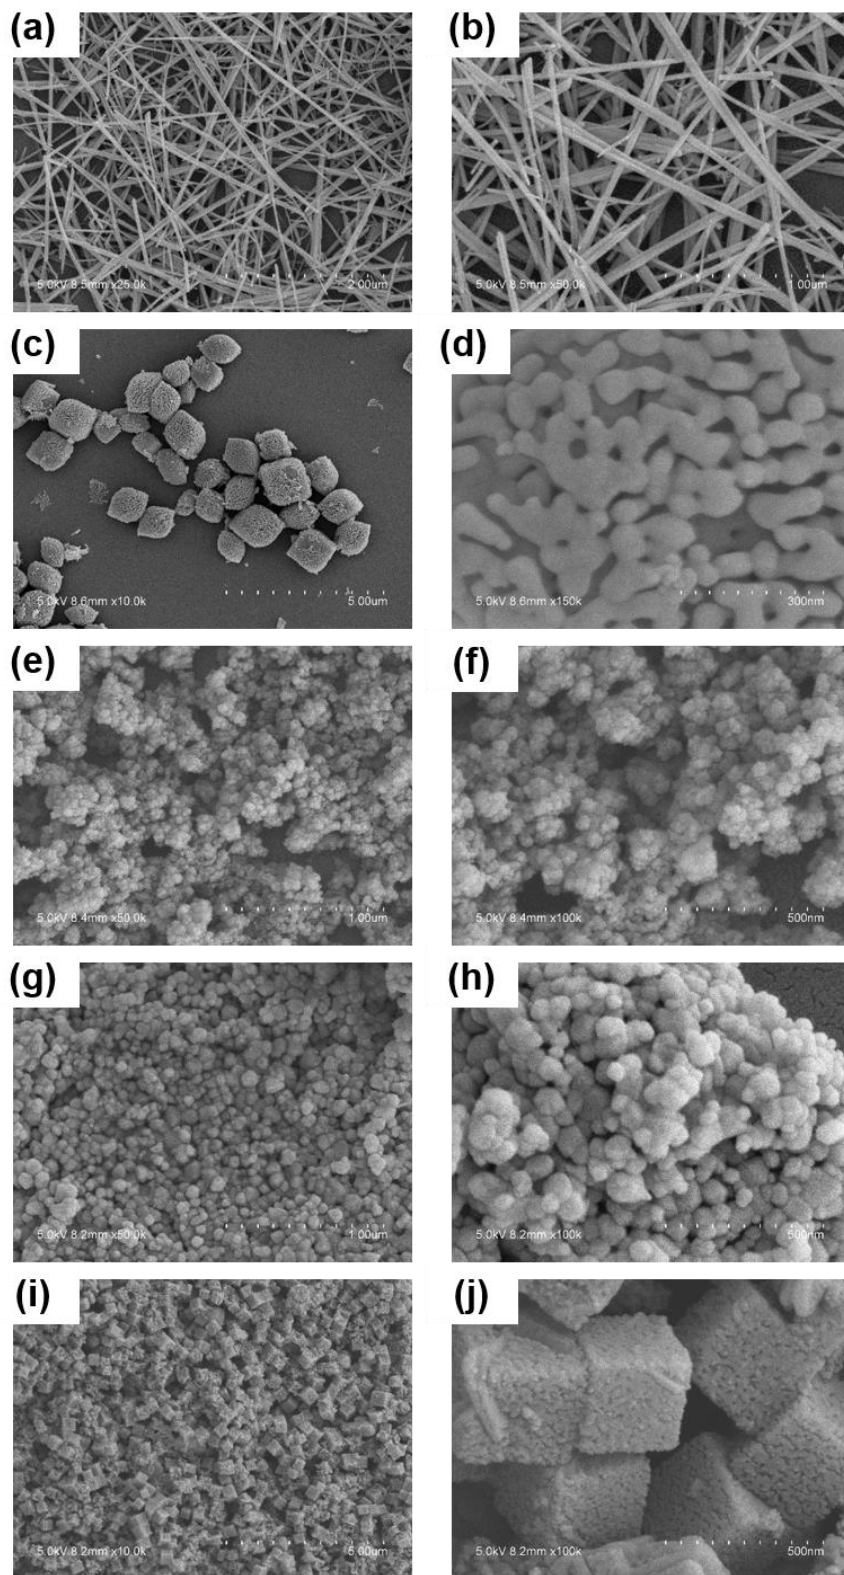

**Supplementary Figure 26.** Representative SEM images of binary TMOs. (a, b)  $\text{MnO}_2$ , (c, d)  $\text{Mn}_2\text{O}_3 \cdot x\text{H}_2\text{O}$ , (e, f)  $\text{CoO}$ , (g, h)  $\text{NiO}$ , and (i, j)  $\text{Fe}_2\text{O}_3$ . Source data are provided as a Source Data file.

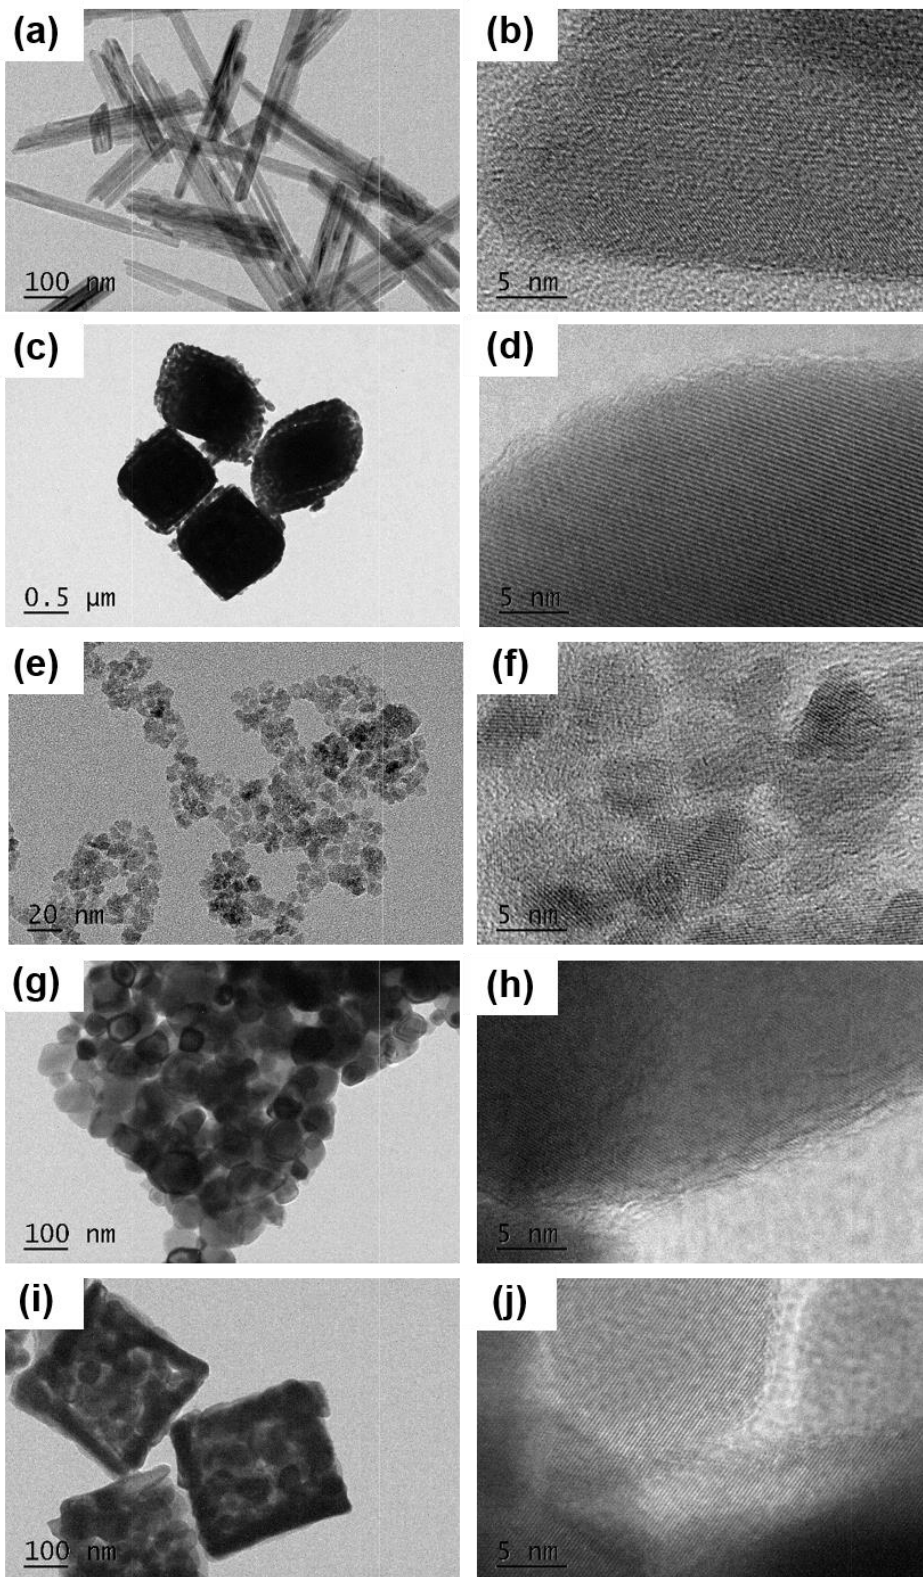

**Supplementary Figure 27.** Representative TEM images of binary TMOs. (a, b) MnO<sub>2</sub>, (c, d) Mn<sub>2</sub>O<sub>3-δ</sub>, (e, f) CoO, (g, h) NiO, and (i, j) Fe<sub>2</sub>O<sub>3</sub>. Source data are provided as a Source Data file.

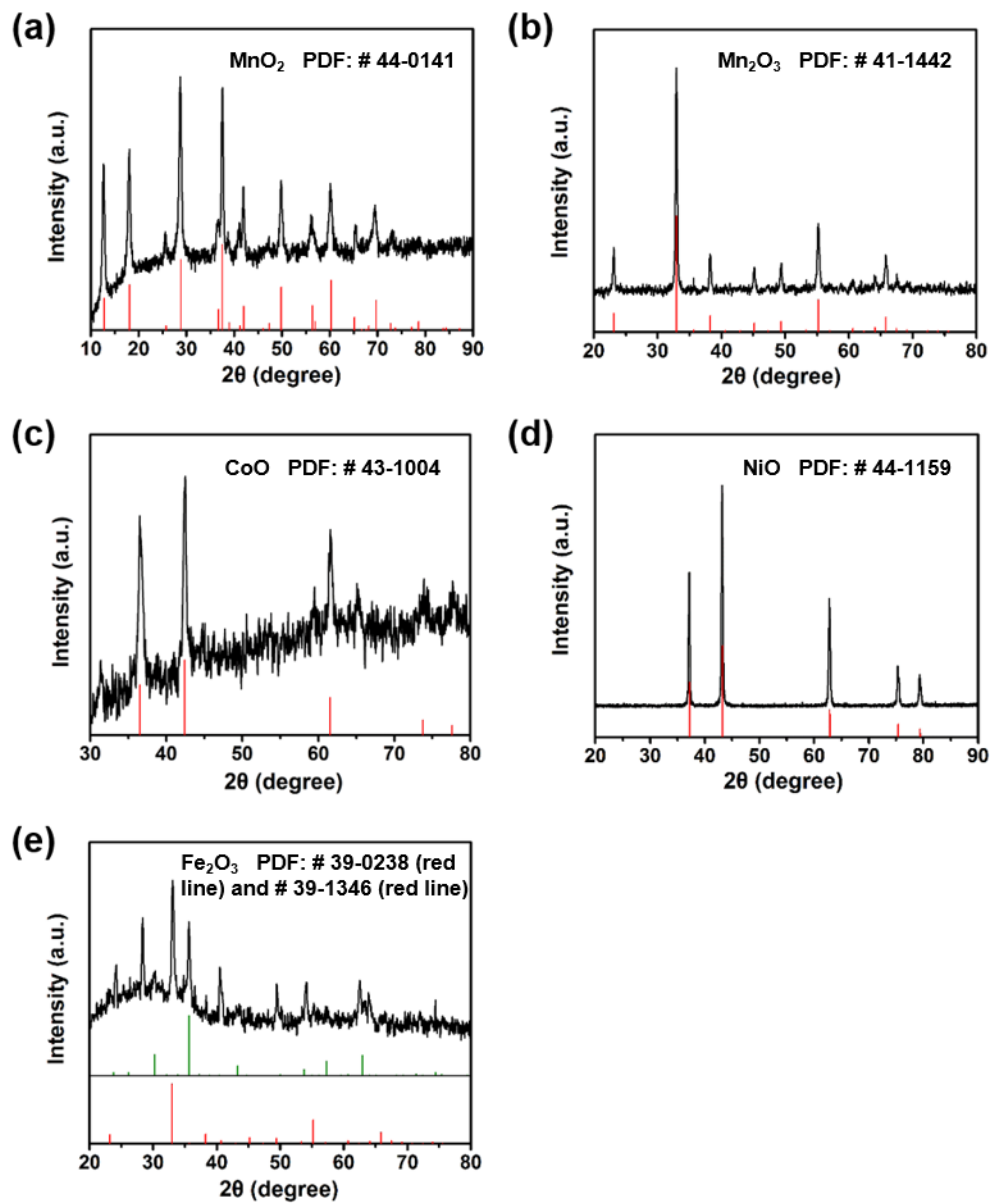

**Supplementary Figure 28.** PXRD patterns of (a)  $\text{MnO}_2$ , (b)  $\text{Mn}_2\text{O}_3$ , (c)  $\text{CoO}$ , (d)  $\text{NiO}$ , and (e)  $\text{Fe}_2\text{O}_3$ . Black curve: measured patterns; red and green curves: corresponding reference patterns from the JCPDS database (red and green curves in panel e for  $\beta\text{-Fe}_2\text{O}_3$  and  $\alpha\text{-Fe}_2\text{O}_3$ , respectively). Source data are provided as a Source Data file.

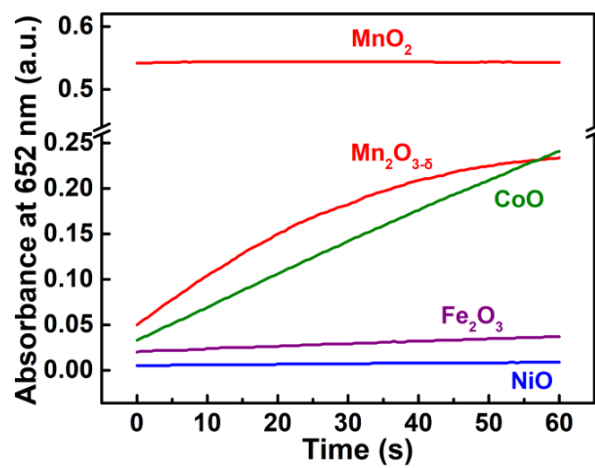

**Supplementary Figure 29.** Kinetic curves of  $A_{652}$  for monitoring the catalytic oxidation of 1 mM TMB with 100 mM  $H_2O_2$  in the presence of  $10 \mu\text{g}\cdot\text{mL}^{-1}$   $MnO_2$ ,  $CoO$ ,  $Mn_2O_{3-\delta}$ ,  $NiO$ , and  $Fe_2O_3$ , respectively. Source data are provided as a Source Data file.



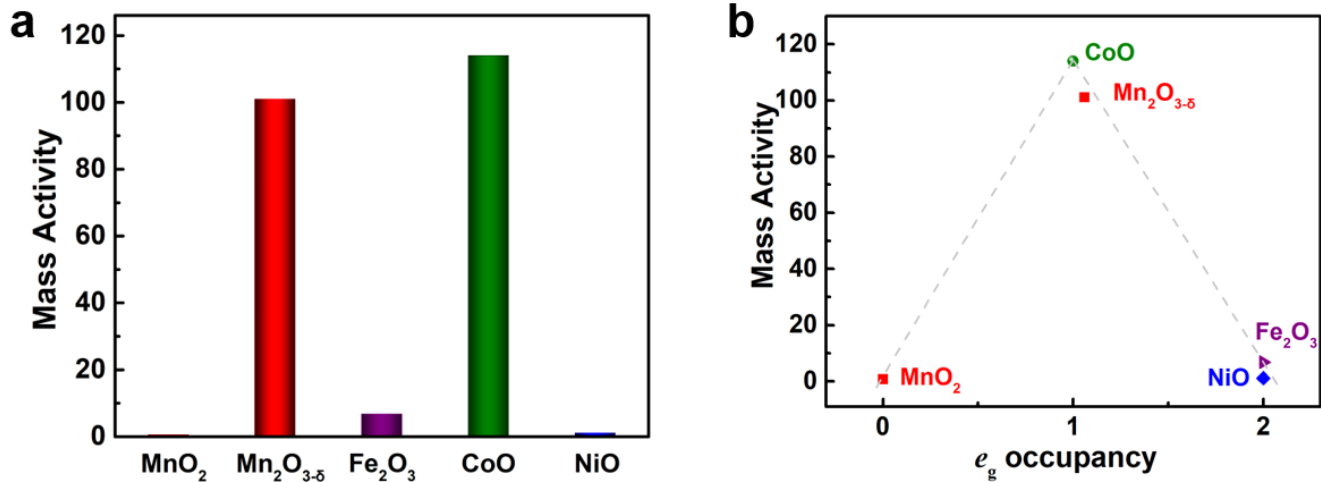

**Supplementary Figure 30.** (a) Mass normalized peroxidase-like activities of binary TMOs. (b) Mass normalized binary metal oxides' peroxidase-like activities as a function of  $e_g$  occupancy. Source data are provided as a Source Data file.

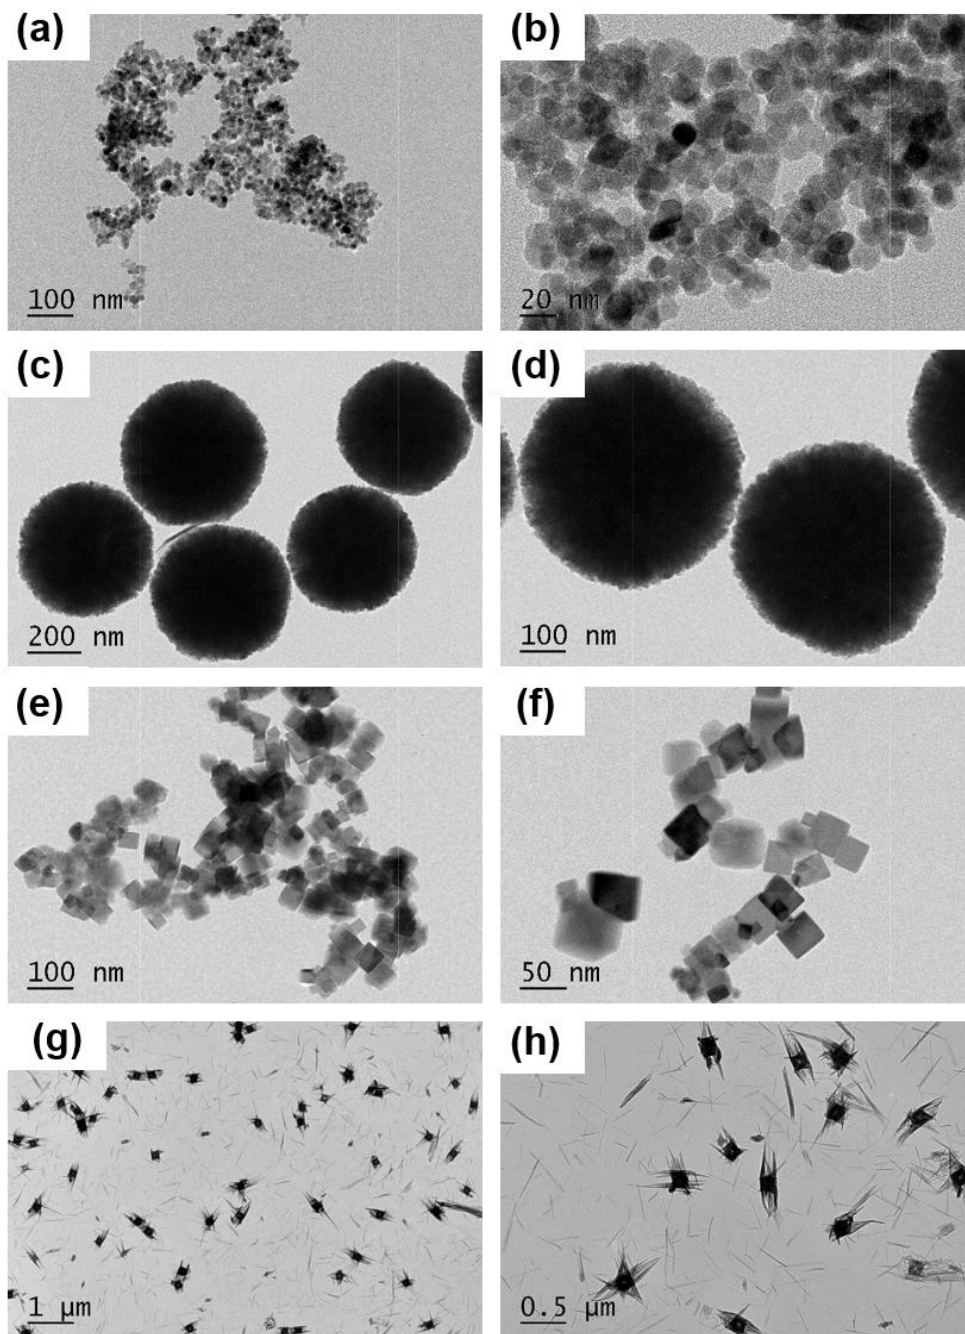

**Supplementary Figure 31.** Representative TEM images of other peroxidase mimics reported by references. (a, b)  $\text{Mn}_3\text{O}_4$ , (c, d)  $\text{Fe}_3\text{O}_4$ , (e, f)  $\text{Co}_3\text{O}_4$ , and (g, h)  $\text{Cu}(\text{OH})_2$ . Source data are provided as a Source Data file.

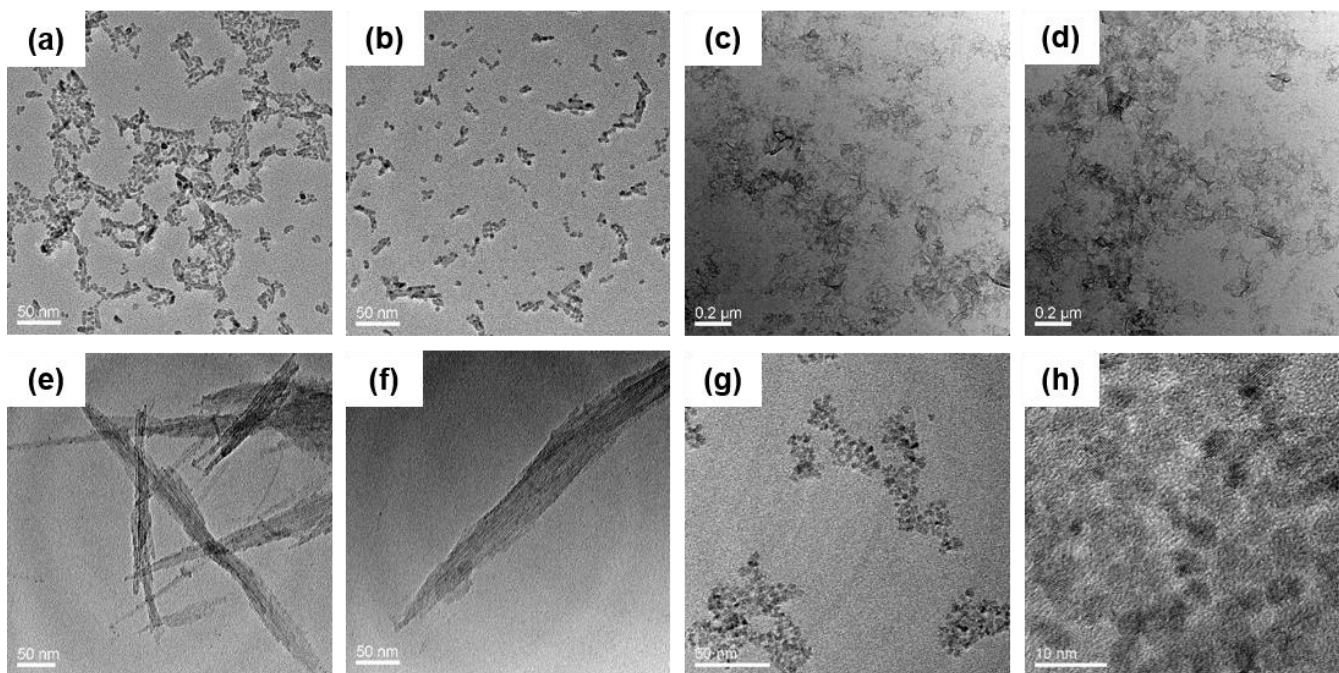

**Supplementary Figure 32.** Representative TEM images of other peroxidase mimics reported by references. (a, b) CuO, (c, d) GO-COOH, (e, f) SWNT, and (g, h) CeO<sub>2</sub>. Source data are provided as a Source Data file.

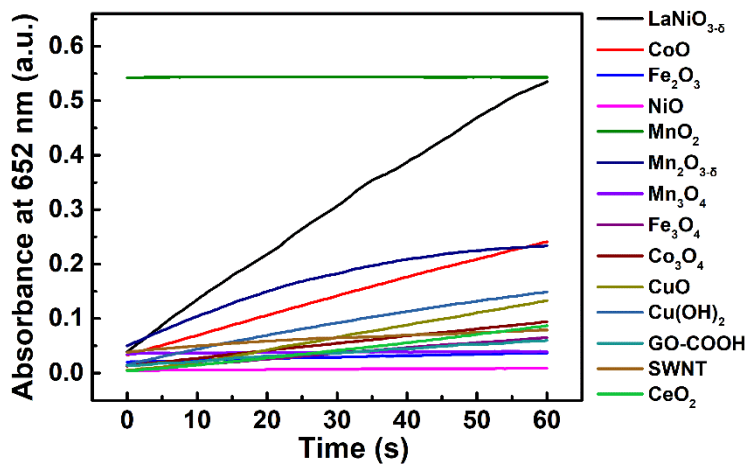

**Supplementary Figure 33.** Kinetic curves of  $A_{652}$  for monitoring the catalytic oxidation of 1 mM TMB with 100 mM  $H_2O_2$  in the presence of  $10 \mu\text{g}\cdot\text{mL}^{-1}$   $\text{LaNiO}_3$  and other typical nanozymes reported by references. Source data are provided as a Source Data file.

**Supplementary Table 1.** BET surface area of the TMOs (including perovskite TMOs) studied in this work.

| Oxide                                                | BET surface area (m <sup>2</sup> ·g <sup>-1</sup> ) | Normalized BET surface area |
|------------------------------------------------------|-----------------------------------------------------|-----------------------------|
| LaNiO <sub>3</sub>                                   | 17.06                                               | 1                           |
| LaNiO <sub>3</sub> -H <sub>2</sub>                   | 12.11                                               | 0.71                        |
| LaMn <sub>0.5</sub> Ni <sub>0.5</sub> O <sub>3</sub> | 12.48                                               | 0.73                        |
| LaCoO <sub>3</sub>                                   | 6.38                                                | 0.37                        |
| LaCrO <sub>3</sub>                                   | 11.76                                               | 0.69                        |
| LaMnO <sub>3</sub>                                   | 17.95                                               | 1.05                        |
| La <sub>0.5</sub> Sr <sub>0.5</sub> MnO <sub>3</sub> | 19.98                                               | 1.17                        |
| CaMnO <sub>3</sub>                                   | 14.07                                               | 0.83                        |
| LaFeO <sub>3</sub>                                   | 10.85                                               | 0.64                        |
| La <sub>0.5</sub> Sr <sub>0.5</sub> FeO <sub>3</sub> | 17.29                                               | 1.01                        |
| SrFeO <sub>3</sub>                                   | 13.48                                               | 0.79                        |
| MnO <sub>2</sub>                                     | 71.98                                               | 4.02                        |
| Mn <sub>2</sub> O <sub>3</sub>                       | 18.16                                               | 1.06                        |
| CoO                                                  | 28.658                                              | 1.68                        |
| NiO                                                  | 8.73                                                | 0.51                        |
| Fe <sub>2</sub> O <sub>3</sub>                       | 59.88                                               | 3.51                        |

**Supplementary Table 2.** ICP-OES analysis of  $\text{LaMn}_{0.5}\text{Ni}_{0.5}\text{O}_3$ ,  $\text{La}_{0.5}\text{Sr}_{0.5}\text{MnO}_3$ , and  $\text{La}_{0.5}\text{Sr}_{0.5}\text{FeO}_3$ .

| Oxide                                        | La    | Sr    | Cr | Ni    | Mn    | Cu | Fe    |
|----------------------------------------------|-------|-------|----|-------|-------|----|-------|
| $\text{LaMn}_{0.5}\text{Ni}_{0.5}\text{O}_3$ | 46.5% |       |    | 26.5% | 27.0% |    |       |
| $\text{La}_{0.5}\text{Sr}_{0.5}\text{MnO}_3$ | 24.4% | 22.3% |    |       | 53.3% |    |       |
| $\text{La}_{0.5}\text{Sr}_{0.5}\text{FeO}_3$ | 24.8% | 20.2% |    |       |       |    | 55.0% |

The ICP-OES analysis confirmed the successful synthesis of the doped perovskite TMOs with desired compositions.

**Supplementary Table 3.** Oxygen vacancy ( $\delta$ ), oxidation state of B site, and nominal  $e_g$  occupancy (standard deviations were obtained by three independent measurements).

| Oxides                                                                     | $\delta$          | Oxidation State      | Nominal $e_g$                     |
|----------------------------------------------------------------------------|-------------------|----------------------|-----------------------------------|
| <b>LaNiO<sub>3-<math>\delta</math></sub></b>                               | $0.11 \pm 0.01$   | $2.77 \pm 0.02$      | $1.22 \pm 0.02$                   |
| <b>LaMn<sub>0.5</sub>Ni<sub>0.5</sub>O<sub>3-<math>\delta</math></sub></b> | $-0.004 \pm 0.01$ | Ni: +2.3<br>Mn: +3.7 | Ni: 1.7<br>Mn: 0.3                |
| <b>LaCoO<sub>3-<math>\delta</math></sub></b>                               | $-0.03 \pm 0.01$  | $3.065 \pm 0.02$     | <b><math>1.06 \pm 0.02</math></b> |
| <b>LaMnO<sub>3-<math>\delta</math></sub></b>                               | $-0.16 \pm 0.006$ | $3.32 \pm 0.01$      | $0.68 \pm 0.01$                   |
| <b>La<sub>0.5</sub>Sr<sub>0.5</sub>MnO<sub>3-<math>\delta</math></sub></b> | $0.015 \pm 0.006$ | $3.47 \pm 0.01$      | $0.53 \pm 0.01$                   |
| <b>CaMnO<sub>3-<math>\delta</math></sub></b>                               | $0.038 \pm 0.005$ | $3.92 \pm 0.01$      | $0.08 \pm 0.01$                   |
| <b>La<sub>0.5</sub>Sr<sub>0.5</sub>FeO<sub>3-<math>\delta</math></sub></b> | $0.21 \pm 0.006$  | $3.08 \pm 0.1$       | $1.92 \pm 0.02$                   |
| <b>SrFeO<sub>3-<math>\delta</math></sub></b>                               | $0.34 \pm 0.005$  | $3.31 \pm 0.01$      | $1.69 \pm 0.01$                   |
| <b>Mn<sub>2</sub>O<sub>3-<math>\delta</math></sub></b>                     | $0.05 \pm 0.01$   | $2.94 \pm 0.01$      | $1.06 \pm 0.02$                   |

**Note:** the nominal  $e_g$  of LaCoO<sub>3- $\delta$</sub>  in [Figure 2b](#) and [Supplementary Figure 15](#) was obtained from magnetic measurements.

**Supplementary Table 4.** Transition metal's valence, spin state, and assignment of  $e_g$  occupancy for the TMOs (including perovskite TMOs).

| Oxides                                                 | Valence            | Spin State | Assignment           | Reference |
|--------------------------------------------------------|--------------------|------------|----------------------|-----------|
| <b>LaNiO<sub>3</sub></b>                               | Ni <sup>3+</sup>   | L.S.       | $t_{2g}^6 e_g^1$     | 1         |
| <b>LaMn<sub>0.5</sub>Ni<sub>0.5</sub>O<sub>3</sub></b> | Ni <sup>2.3+</sup> | L.S.       | $t_{2g}^6 e_g^{1.7}$ | 2         |
|                                                        | Mn <sup>3.7+</sup> | H.S.       | $t_{2g}^6 e_g^{0.3}$ |           |
| <b>LaCoO<sub>3</sub></b>                               | Co <sup>3+</sup>   | I.S.       | $t_{2g}^5 e_g^1$     | 3,4       |
| <b>LaCrO<sub>3</sub></b>                               | Cr <sup>3+</sup>   | N/A        | $t_{2g}^3 e_g^0$     | 1         |
| <b>LaMnO<sub>3</sub></b>                               | Mn <sup>3+</sup>   | H.S.       | $t_{2g}^3 e_g^1$     | 5         |
| <b>La<sub>0.5</sub>Sr<sub>0.5</sub>MnO<sub>3</sub></b> | Mn <sup>3.5+</sup> | H.S.       | $t_{2g}^3 e_g^{0.5}$ | 6         |
| <b>CaMnO<sub>3</sub></b>                               | Mn <sup>4+</sup>   | L.S.       | $t_{2g}^3 e_g^0$     | 7,8       |
| <b>LaFeO<sub>3</sub></b>                               | Fe <sup>3+</sup>   | H.S.       | $t_{2g}^3 e_g^2$     | 9         |
| <b>La<sub>0.5</sub>Sr<sub>0.5</sub>FeO<sub>3</sub></b> | Fe <sup>3.5+</sup> | H.S.       | $t_{2g}^3 e_g^{1.5}$ | 2,9       |
| <b>SrFeO<sub>3</sub></b>                               | Fe <sup>4+</sup>   | H.S.       | $t_{2g}^6 e_g^1$     | 10        |
| <b>MnO<sub>2</sub></b>                                 | Mn <sup>4+</sup>   | L.S.       | $t_{2g}^3 e_g^0$     | 11        |
| <b>Mn<sub>2</sub>O<sub>3</sub></b>                     | Mn <sup>3+</sup>   | H.S.       | $t_{2g}^3 e_g^1$     | 12        |
| <b>CoO</b>                                             | Co <sup>2+</sup>   | L.S.       | $t_{2g}^6 e_g^1$     | 13        |
| <b>NiO</b>                                             | Ni <sup>2+</sup>   | H.S.       | $t_{2g}^6 e_g^2$     | 14        |
| <b>Fe<sub>2</sub>O<sub>3</sub></b>                     | Fe <sup>3+</sup>   | H.S.       | $t_{2g}^3 e_g^2$     | 15        |

**Note:** H.S., high spin state; L.S., low spin state; I.S., intermediate spin state; N/A, not applicable.



**Supplementary Table 5.** BET surface area of other nanomaterials studied in this work.

| <b>Oxide</b>                       | <b>BET surface area (m<sup>2</sup>·g<sup>-1</sup>)</b> | <b>Normalized BET surface area</b> |
|------------------------------------|--------------------------------------------------------|------------------------------------|
| <b>Mn<sub>3</sub>O<sub>4</sub></b> | 88.43                                                  | 5.18                               |
| <b>Fe<sub>3</sub>O<sub>4</sub></b> | 53.99                                                  | 3.16                               |
| <b>Co<sub>3</sub>O<sub>4</sub></b> | 14.45                                                  | 0.85                               |
| <b>SWNT</b>                        | 703.95                                                 | 41.26                              |
| <b>CuO</b>                         | 101.23                                                 | 5.93                               |
| <b>CeO<sub>2</sub></b>             | 714.51                                                 | 41.88                              |
| <b>Cu(OH)<sub>2</sub></b>          | 61.456                                                 | 3.60                               |
| <b>GO-COOH</b>                     | 40.33                                                  | 2.36                               |

**Supplementary Table 6.** Effective magnetic moment ( $\mu_{\text{eff}}$ ) and  $e_g$  occupancy for different spin states of cobalt ion in  $\text{LaCoO}_{3-\delta}$ . $\delta$ .

| Samples                             |         | $\text{LaCoO}_{3-\delta}$ |                 |                       |
|-------------------------------------|---------|---------------------------|-----------------|-----------------------|
| Spin state                          | LS      | HS                        | 50% HS + 50% LS | 49.56% HS + 50.44% LS |
| $\mu_{\text{eff}} (\mu_{\text{B}})$ | 0       | 4.90                      | 3.46            | 3.45                  |
| $e_g$ occupancy                     | $e_g^0$ | $e_g^2$                   | $e_g^1$         | $e_g^{0.99}$          |

**Supplementary Table 7.** Comparison of literature results and ours on the peroxidase-like activities of several binary TMOs.

| Oxide                          | Diameter          | Catalyst                                                          | H <sub>2</sub> O <sub>2</sub> | Substrate                       | Comments                                                                                                                                                                                  | Ref.      |
|--------------------------------|-------------------|-------------------------------------------------------------------|-------------------------------|---------------------------------|-------------------------------------------------------------------------------------------------------------------------------------------------------------------------------------------|-----------|
| NiO                            | 32 nm             | H <sub>2</sub> TCPP-NiO<br>(40 µg·mL <sup>-1</sup> )              | 250 mM                        | TMB (0.5 mM)                    | The peroxidase-like activity could be mainly originated from the H <sub>2</sub> TCPP on the NiO surface.                                                                                  | 16        |
| NiO                            | 3-5 µm            | NiO nanoflowers<br>(190.5 µg·mL <sup>-1</sup> )                   | 3.8 mM                        | TMB (95.2 µM)                   | In Figure 5, as high as 0.003 mol·mL <sup>-1</sup> (225 mg·mL <sup>-1</sup> ) NiO was used.                                                                                               | 17        |
| NiO                            | 100 nm            | NiO nanoparticles<br>(10 µg·mL <sup>-1</sup> )                    | 50 mM                         | TMB (0.8 mM)                    |                                                                                                                                                                                           | This work |
| MnO <sub>2</sub>               | 4.5 nm            | BSA-MnO <sub>2</sub><br>(3.7 µg·mL <sup>-1</sup> )                | N/A                           | OPD (N/A)                       |                                                                                                                                                                                           | 18        |
| MnO <sub>2</sub>               | 30 nm in diameter | MnO <sub>2</sub> nanorod<br>(10 µg·mL <sup>-1</sup> )             | 50 mM                         | TMB (0.8 mM)                    |                                                                                                                                                                                           | This work |
| Fe <sub>2</sub> O <sub>3</sub> | 9 nm              | γ-Fe <sub>2</sub> O <sub>3</sub> (20 µg·mL <sup>-1</sup> )        | 130 mM                        | TMB (0.25 mg·mL <sup>-1</sup> ) | γ-Fe <sub>2</sub> O <sub>3</sub> was coated by DMSA.                                                                                                                                      | 19        |
| Fe <sub>2</sub> O <sub>3</sub> | 20-50 nm          | TemFe A<br>(44.4 µg·mL <sup>-1</sup> )                            | 4.44 M                        | TMB (1.11 mM)                   | The catalysis of TMB oxidation was attributed to Fe <sup>2+</sup> on the surface of Fe <sub>2</sub> O <sub>3</sub> which can react with H <sub>2</sub> O <sub>2</sub> by Fenton reaction. | 20        |
| Fe <sub>2</sub> O <sub>3</sub> | 350 nm            | Fe <sub>2</sub> O <sub>3</sub> cubes<br>(10 µg·mL <sup>-1</sup> ) | 50 mM                         | TMB (0.8 mM)                    |                                                                                                                                                                                           | This work |

**Note:** Ref., Reference; N/A, not applicable; H<sub>2</sub>TCPP, 5,10,15,20-tetrakis(4-carboxylphenyl)-porphyrin; DMSA, dimercaptosuccinic acid; TemFe, Template A prepared Fe<sub>2</sub>O<sub>3</sub> nanoparticles; TMB, 3,3',5,5'-tetramethylbenzidine; OPD, *o*-phenylenediamine.

**Supplementary Table 8.** Kinetics parameters of TMOs as well as other representative nanozymes.

| Catalyst                                                 | Substrate                     | $K_m$ (mM) | $v_{max}$ (Ms <sup>-1</sup> ) |
|----------------------------------------------------------|-------------------------------|------------|-------------------------------|
| <b>SrFeO<sub>3-δ</sub></b>                               | H <sub>2</sub> O <sub>2</sub> | 6.05       | 0.18×10 <sup>-6</sup>         |
| <b>La<sub>0.5</sub>Sr<sub>0.5</sub>MnO<sub>3-δ</sub></b> | H <sub>2</sub> O <sub>2</sub> | 40.08      | 0.54×10 <sup>-6</sup>         |
| <b>La<sub>0.5</sub>Sr<sub>0.5</sub>FeO<sub>3-δ</sub></b> | H <sub>2</sub> O <sub>2</sub> | 8.14       | 0.13×10 <sup>-6</sup>         |
| <b>LaNiO<sub>3-δ</sub></b>                               | H <sub>2</sub> O <sub>2</sub> | 359.92     | 4.63×10 <sup>-6</sup>         |
| <b>LaNiO<sub>3-δ</sub>-H<sub>2</sub></b>                 | H <sub>2</sub> O <sub>2</sub> | 125.96     | 1.45×10 <sup>-6</sup>         |
| <b>LaMnO<sub>3-δ</sub></b>                               | H <sub>2</sub> O <sub>2</sub> | 31.43      | 0.68×10 <sup>-6</sup>         |
| <b>LaMn<sub>0.5</sub>Ni<sub>0.5</sub>O<sub>3</sub></b>   | H <sub>2</sub> O <sub>2</sub> | 112.84     | 0.44×10 <sup>-6</sup>         |
| <b>CoO</b>                                               | H <sub>2</sub> O <sub>2</sub> | 92.10      | 1.14×10 <sup>-6</sup>         |
| <b>LaCoO<sub>3-δ</sub></b>                               | H <sub>2</sub> O <sub>2</sub> | 205.45     | 0.93×10 <sup>-6</sup>         |
| <b>SWNT</b>                                              | H <sub>2</sub> O <sub>2</sub> | 2.41       | 0.10×10 <sup>-6</sup>         |
| <b>GO-COOH</b>                                           | H <sub>2</sub> O <sub>2</sub> | 23.66      | 0.11×10 <sup>-6</sup>         |
| <b>CeO<sub>2</sub></b>                                   | H <sub>2</sub> O <sub>2</sub> | 4.41       | 0.18×10 <sup>-6</sup>         |
| <b>Fe<sub>2</sub>O<sub>3</sub></b>                       | H <sub>2</sub> O <sub>2</sub> | 75.97      | 0.068×10 <sup>-6</sup>        |
| <b>Fe<sub>3</sub>O<sub>4</sub></b>                       | H <sub>2</sub> O <sub>2</sub> | 41.66      | 0.16×10 <sup>-6</sup>         |
| <b>CuO</b>                                               | H <sub>2</sub> O <sub>2</sub> | 31.18      | 0.28×10 <sup>-6</sup>         |
| <b>Co<sub>3</sub>O<sub>4</sub></b>                       | H <sub>2</sub> O <sub>2</sub> | 41.75      | 0.26×10 <sup>-6</sup>         |
| <b>Mn<sub>2</sub>O<sub>3</sub></b>                       | H <sub>2</sub> O <sub>2</sub> | 12.53      | 1.01×10 <sup>-6</sup>         |
| <b>Cu(OH)<sub>2</sub></b>                                | H <sub>2</sub> O <sub>2</sub> | 28.91      | 0.34×10 <sup>-6</sup>         |
| <b>LaCrO<sub>3</sub></b>                                 | H <sub>2</sub> O <sub>2</sub> | /          | 0.017×10 <sup>-6</sup>        |
| <b>LaFeO<sub>3</sub></b>                                 | H <sub>2</sub> O <sub>2</sub> | /          | 0.019×10 <sup>-6</sup>        |
| <b>CaMnO<sub>3-δ</sub></b>                               | H <sub>2</sub> O <sub>2</sub> | /          | 0.015×10 <sup>-6</sup>        |
| <b>NiO</b>                                               | H <sub>2</sub> O <sub>2</sub> | /          | 0.011×10 <sup>-6</sup>        |
| <b>MnO<sub>2</sub></b>                                   | H <sub>2</sub> O <sub>2</sub> | /          | 0.0064×10 <sup>-6</sup>       |
| <b>Mn<sub>3</sub>O<sub>4</sub></b>                       | H <sub>2</sub> O <sub>2</sub> | /          | 0.013×10 <sup>-6</sup>        |

**Supplementary Table 9.** The ground state magnetic orderings, space groups, and lattice parameters for ABO<sub>3</sub> perovskites obtained by calculations with the corresponding references.

| Perovskite                                                | Magnetic ordering | Space group | Lattice parameters                                                                                                       | References |
|-----------------------------------------------------------|-------------------|-------------|--------------------------------------------------------------------------------------------------------------------------|------------|
| <b>CaMnO<sub>3</sub></b>                                  | G-AFM             | Pnma (62)   | $a = 5.412 \text{ \AA}; b = 7.570 \text{ \AA}; c = 5.334 \text{ \AA}; \alpha = \beta = \gamma = 90.0^\circ$              | 21,22      |
| <b>LaCrO<sub>3</sub></b>                                  | G-AFM             | O-Pnma      | $a = 5.568 \text{ \AA}; b = 5.613 \text{ \AA}; c = 7.890 \text{ \AA}; \alpha = \beta = \gamma = 90.0^\circ$              | 23-25      |
| <b>La<sub>0.5</sub>Sr<sub>0.5</sub>MnO<sub>3</sub></b>    | A-AFM             | I-42M (121) | $a = b = c = 5.556 \text{ \AA}; \alpha = \beta = 120.7^\circ; \gamma = 88.7^\circ$                                       | 26,27      |
| <b>LaNiO<sub>3</sub></b>                                  | PM                | R-R3c       | $a = b = c = 5.433 \text{ \AA}; \alpha = \beta = \gamma = 61.4^\circ$                                                    | 28-31      |
| <b>LaCoO<sub>3</sub></b>                                  | PM                | R-R3c       | $a = b = c = 5.466 \text{ \AA}; \alpha = \beta = \gamma = 60.9^\circ$                                                    | 32,33      |
| <b>LaMnO<sub>3</sub></b>                                  | (HS : LS = 1 : 1) | O-Pnma      | $a = 5.816 \text{ \AA}; b = 7.820 \text{ \AA}; c = 5.583 \text{ \AA}; \alpha = \beta = \gamma = 90.0^\circ$              | 25,34-37   |
| <b>SrFeO<sub>3</sub></b>                                  | A-AFM             | Pm-3m (221) | $a = b = c = 3.911 \text{ \AA}; \alpha = \beta = \gamma = 90.0^\circ$                                                    | 38         |
| <b>SrFeO<sub>2.5</sub></b>                                | PM                | C1          | $a = 7.859 \text{ \AA}; b = 7.910 \text{ \AA}; c = 7.720 \text{ \AA}; \alpha = \gamma = 90.0^\circ; \beta = 90.1^\circ$  | 38         |
| <b>LaMn<sub>0.5</sub>Ni<sub>0.5</sub>O<sub>3</sub></b>    | (HS : LS = 1 : 1) | C2/M (12)   | $a = 9.561 \text{ \AA}; b = 5.551 \text{ \AA}; c = 7.816 \text{ \AA}; \alpha = \gamma = 90.0^\circ; \beta = 144.6^\circ$ | 39         |
| <b>La<sub>0.5</sub>Sr<sub>0.5</sub>FeO<sub>3</sub></b>    | PM                | I-42M (121) | $a = b = c = 5.557 \text{ \AA}; \alpha = \beta = 120.5^\circ; \gamma = 89.1^\circ$                                       | 40         |
| <b>La<sub>0.5</sub>Sr<sub>0.5</sub>FeO<sub>2.75</sub></b> | (HS : LS = 1 : 1) | CM (8)      | $a = b = 5.513 \text{ \AA}; c = 11.114 \text{ \AA}; \alpha = \beta = 119.7^\circ; \gamma = 90.0^\circ$                   | 40         |
| <b>LaFeO<sub>3</sub></b>                                  | A-AFM             | O-Pnma      | $a = 5.667 \text{ \AA}; b = 7.945 \text{ \AA}; c = 5.601 \text{ \AA}; \alpha = \beta = \gamma = 90.0^\circ$              | 23,25,40   |

**Supplementary Table 10.** Collection of the  $U_{\text{eff}}$  values for  $d$  orbitals of transition metals.

| Element          | Cr  | Mn  | Fe  | Co   | Ni  |
|------------------|-----|-----|-----|------|-----|
| $U_{\text{eff}}$ | 3.7 | 3.9 | 5.3 | 3.32 | 6.2 |

## Supplementary Notes

**Supplementary Note 1.** To further study the correlation between the  $e_g$  occupancy and their peroxidase-like activity, Ni-based perovskites were investigated. As shown in [Supplementary Figure 10](#),  $\text{LaNiO}_{3-\delta}$ , with  $e_g$  occupancy of 1.22, showed a high catalytic activity. The  $\text{LaNiO}_{3-\delta}\text{-H}_2$  composition was obtained by annealing  $\text{LaNiO}_3$  nanoparticles at 350 °C for 2 h under a forming gas atmosphere of 5%  $\text{H}_2$  in argon. The  $\text{Ni}^{3+}$  ions in the  $\text{LaNiO}_{3-\delta}$  nanoparticles were partially reduced to  $\text{Ni}^{2+}$  upon annealing. As shown in [Supplementary Figure 10b](#), the main PXRD peak of the  $\text{LaNiO}_{3-\delta}\text{-H}_2$  nanoparticles shifted to slightly lower angles compared to that of the untreated  $\text{LaNiO}_3$  nanoparticles, reflecting the lattice expansion due to the formation of larger  $\text{Ni}^{2+}$  cations. The activity of  $\text{LaNiO}_{3-\delta}\text{-H}_2$ , with  $e_g$  occupancy > 1.22, was approximately 44.1% of that of  $\text{LaNiO}_{3-\delta}$ . Moreover,  $\text{LaMn}_{0.5}\text{Ni}_{0.5}\text{O}_3$  was formed by partial substitution of Ni by Mn in  $\text{LaNiO}_3$ . The introduction of  $\text{Ni}^{2+}$  in the  $\text{LaNiO}_3$  lattice resulted in an effective  $e_g$  occupancy of 1.7 for Ni ([Supplementary Figure 10f](#)), and in a corresponding 7.71-fold decrease in activity compared to  $\text{LaNiO}_{3-\delta}$ . These results demonstrate that an  $e_g$  occupancy of 1.22 enhances the peroxidase-like activity of perovskites.

## Supplementary Note 2.

**$e_g$  occupancy of  $\text{Co}^{3+}$  in  $\text{LaCoO}_3$ .** The exact of  $e_g$  of  $\text{Co}^{3+}$  in  $\text{LaCoO}_3$  has been an ongoing debate.<sup>41</sup> For example, several previous studies showed that the cobalt ion in  $\text{LaCoO}_3$  has intermediate spin with an  $e_g$  filling near unity.<sup>1,2</sup> Therefore, we measured the  $e_g$  of Co in our  $\text{LaCoO}_{3-\delta}$  from the magnetization experiments with a MPMS SQUID magnetometer.<sup>4</sup> As shown in [Supplementary Figure 14a](#), the temperature-dependent magnetization of  $\text{LaCoO}_{3-\delta}$  was measured on a MPMS SQUID magnetometer (MPMS-3, Quantum Design) with a magnetic field of  $H = 1$  kOe under field-cooling procedures to calculate the  $e_g$  occupancy of cobalt ions. The temperature-dependent susceptibilities can be obtained from magnetization data ( $\chi = M/H$ ) ([Supplementary Figure 14b](#)). More, susceptibilities obey a paramagnetic Curie-Weiss law above 150 K, *i.e.*,  $\chi = C/(T-\theta)$ , where C is Curie constant and can be obtained according to the fitting result in [Supplementary Figure 14b](#). The effective magnetic moments ( $\mu_{\text{eff}}$ ) for  $\text{LaCoO}_{3-\delta}$  was obtained by  $\mu_{\text{eff}} = \sqrt{8C}\mu_B$ . The spin state of cobalt ion in  $\text{LaCoO}_{3-\delta}$  was controversial in past decades. Recent theoretical and experimental studies suggested that the mixture of low spin (LS) state and high spin (HS) state is more favorable. Here, we assumed the spin state of  $\text{Co}^{3+}$  in  $\text{LaCoO}_{3-\delta}$  consists of LS state ( $t_{2g}^6e_g^0$ ,  $0 \mu_B$ ) and HS state ( $t_{2g}^4e_g^2$ ,  $4.9 \mu_B$ ). The fractions of Co ions in different spin states can be obtained from the relationship:  $\mu_{\text{eff}} = g\mu_B\sqrt{S_{\text{HS}}(S_{\text{HS}}+1)V_{\text{HS}} + S_{\text{LS}}(S_{\text{LS}}+1)V_{\text{LS}}}$ , where  $S_{\text{HS}}$  and  $S_{\text{LS}}$  are the S values, and  $V_{\text{HS}}$  and  $V_{\text{LS}}$  are the volume fraction for

Co ions in HS and LS states. The  $e_g$  electron occupancy ( $x$ ) can be obtained by  $x = S_{HS} * V_{HS} + S_{LS} * V_{LS}$ . As shown in [Supplementary Figure 14 and Supplementary Table 6](#), an  $e_g$  of 0.99 was obtained for our  $\text{LaCoO}_{3-\delta}$ . Therefore, the claim that the high peroxidase-like activity should be observed for  $e_g$  around 1 also holds true for  $\text{LaCoO}_{3-\delta}$ .

### Supplementary Note 3.

**Effect of B-O covalency on peroxidase-like activity.** For  $\text{LaMnO}_{3-\delta}$ ,  $\text{LaCoO}_{3-\delta}$ , and  $\text{LaNiO}_{3-\delta}$  with the same A site and unit  $e_g$  occupancy shown in [Supplementary Figure 19](#), their peroxidase-like activity follows the trend:  $\text{LaMnO}_{3-\delta} < \text{LaCoO}_{3-\delta} < \text{LaNiO}_{3-\delta}$ . To understand this trend, the dependence of the specific activity on the B-O covalency of  $\text{LaMnO}_{3-\delta}$ ,  $\text{LaCoO}_{3-\delta}$ , and  $\text{LaNiO}_{3-\delta}$  is plotted, showing a good correlation. Taken together, our results show that the peroxidase-like activity of perovskites is governed primarily by  $e_g$  occupancy and secondarily by B-O covalency. (Note, the B-O covalency values, quantified by the normalized  $\text{O } 1s \rightarrow \text{B } 3d - \text{O } 2p$  absorbance from O K-edge X-ray absorption spectra.<sup>2</sup>) Moreover, the highest peroxidase-like activity observed for  $\text{LaNiO}_{3-\delta}$  nanozyme could be understood by its unit  $e_g$  occupancy and strong B-O covalency.

**Supplementary Note 4.** Several studies reported the peroxidase-like activities of  $\text{MnO}_2$ ,  $\text{Fe}_2\text{O}_3$ , and NiO. According our proposed design principles, however, neither of them should be active due to their  $e_g$  occupancy (i.e.,  $\text{MnO}_2$  ( $e_g=0$ ),  $\text{Fe}_2\text{O}_3$  ( $e_g=2$ ), and NiO ( $e_g=2$ )). Indeed, our experimental results showed that all of the three nanozymes exhibited negligible peroxidase-like activities. This discrepancy can be attributed to several factors (see [Supplementary Table 7](#)). First, for most of the previous studies, the amounts of nanozymes, TMB, and  $\text{H}_2\text{O}_2$  used were much higher than the current study. It would be reasonable to observe the nanomaterials mediated TMB oxidation under those conditions. Second, some of the previous studies used nanozyme with much smaller sizes, which would in turn enhance their peroxidase-like activities. Third, some of the peroxidase-like were from the other components rather than the nanomaterials themselves (for instance, the peroxidase-like activity of  $\text{H}_2\text{TCCP-NiO}$  was mainly from  $\text{H}_2\text{TCCP}$  rather than NiO). Moreover, the surface chemistry may also play an important role in the metal oxides' peroxidase-like activities (for example,  $\text{Fe}^{2+}$  on the surface of  $\text{Fe}_2\text{O}_3$  may be responsible for the observed peroxidase-like activity of the  $\text{Fe}_2\text{O}_3$  in the previous study).

**Supplementary Note 5.** In [Supplementary Figures 15 and 30](#), the mass normalized peroxidase-like activities of TMOs were plotted versus  $e_g$  occupancy. While the BET surface area based specific activities reflected the nanozymes' intrinsic activities, the mass-based activities were also critical for practical applications since the nanozymes with high mass activities would



reduce the catalysts' cost and weight. As shown in [Supplementary Figures 15 and 30](#), the overall mass activity trends of the TMOs based nanozymes were also governed by  $e_g$  electron occupancy. More, the  $e_g$  dependent mass normalized activities of TMOs exhibited a volcano-shaped relationship. As shown in [Figures 2, 4 and Supplementary Figures 15 and 30](#),  $\text{LaNiO}_{3-\delta}$  based nanozyme exhibited both the highest specific and mass activities, therefore it was the best nanozyme with peroxidase-like activity.

**Supplementary Note 6.** The lowest-energy structures and electronic configurations for perovskites have been extensively studied previously. Their ground state magnetic orderings vary from G-AFM, A-AFM, and PM ([Supplementary Table 9](#)). To consider all these possible spin alignments, we used a sufficiently large unit cell,  $\text{A}_8\text{B}_8\text{O}_{24}$ , for each defect-free perovskite bulk structure ([Supplementary Figure 20](#)). For  $\text{SrFeO}_{2.5}$  and  $\text{La}_{0.5}\text{Sr}_{0.5}\text{FeO}_{2.75}$  with oxygen vacancies, we used  $\text{A}_8\text{B}_8\text{O}_{20}$  and  $\text{A}_8\text{B}_8\text{O}_{22}$  unit cells, respectively ([Supplementary Figure 20](#)). The oxygen vacancies in each of these defect structures were kept to be separated from each other as far as possible. For geometry optimizations of bulks, their space group symmetries ([Supplementary Table 9](#)) were used to constrain the geometries. For geometry optimizations using slab models, lattice parameters and atoms in the bottom two layers (i.e., one AO and one  $\text{BO}_2$  layer) were frozen, and the above atoms were allowed to move. For perovskites, all B sites in  $\text{BO}_2$  terminated (001) facets are five coordinated in the form of  $\text{BO}_5$ , each of which has one open coordination site, analogous to metals in metalloporphyrins, i.e., active centers of many natural enzymes. These B sites are thus the most probable active centers for perovskites in catalysis. For this reason, we focused our attention on  $\text{BO}_2$ -terminated (001) facets to study the role of  $e_g$  occupancy in their peroxidase mimicking catalysis. All the (001) slab models were cut from the correspondingly relaxed perovskite bulk structures. Test calculations using the  $\text{LaNiO}_3$  (001) slab model with an atomic layer 8 and a vacuum height 15 Å predicted an oxygen adsorption energy very close to that by the 6 atomic layer and 15 Å vacuum height model (-2.27 vs. -2.22 eV). Similarly, both models also predicted very close  $\text{H}_2\text{O}_2$  adsorption energies (-0.95 vs. -0.91 eV). Therefore, for all slab models, their atomic layers and vacuum heights were set to 6 and 15 Å, respectively ([Supplementary Figure 21](#)).

Adsorption energies were calculated with the following equation,

$$E_{\text{ads}} = E_{\text{slab+mol}} - (E_{\text{slab}} + E_{\text{mol}})$$

where  $E_{\text{slab+mol}}$  denotes the total energy of the interacting  $\text{ABO}_3$  slab and adsorbate system, and  $E_{\text{slab}}$  and  $E_{\text{mol}}$  are the energies of the isolated slab and adsorbate, respectively. Because the energies of perovskite slabs were dependent on their magnetic orderings, attention was paid to tune the magnetic orderings when calculating the adsorption energies. Briefly, the initial magnetic moments and orderings of the perovskite (001) slabs were kept the same as those of the corresponding bulks. For slabs with adsorbents, only those for the adsorption sites were allowed to change. We found that the adsorption of a  $\text{H}_2\text{O}_2$  molecule on the surfaces did not change the magnetic moments of the pristine surfaces significantly. The adsorption of an OH group on each B site reduced the magnetic moment of the site by about one unit, because of the antiferromagnetic coupling of the spins. The adsorption of an O atom on each B site either reduced or minimally changed the magnetic moment of the site.

Adsorption energies calculated using the above method did not include the contribution of zero-point energies (ZPEs) and entropies of the systems. However, most of these items would be cancelled out when relative  $E_{\text{ads}}$ 's were considered. For example, we performed frequency analyses for  $\text{LaNiO}_3$  and  $\text{LaFeO}_3$  (011) slabs and their O adsorption species,  $\text{O@LaNiO}_3$  and  $\text{O@LaFeO}_3$ , to obtain their ZPEs and entropies, using the Phonopy code. No atoms were frozen in these calculations. The obtained ZPEs for these four species were 2.9, 3.1, 3.1, and 3.3 eV, respectively, and the entropies were 1.4, 1.3, 1.0, and 1.1  $\text{kJ}\cdot\text{mol}^{-1}\cdot\text{K}^{-1}$ , respectively. The  $E_{\text{ads,O}}$ 's on  $\text{LaNiO}_3$  and  $\text{LaFeO}_3$  (001) surfaces before ZPE and entropy corrections were  $-1.7$  and  $-1.8$  eV, respectively. After the corrections, they became  $-0.8$  and  $-0.8$  eV, respectively. The differences of  $\text{LaNiO}_3$  and  $\text{LaFeO}_3$  in  $E_{\text{ads}}$ 's before and after the correction were both within 0.1 eV. These calculations verified that ZPE and entropy corrections little influenced the relative order of the adsorption energies.

The O  $p$ -band centers of perovskite bulks were calculated as the centroid of the densities of states projected onto the  $2p$  orbitals of the O atoms using the following equation

$$\bar{O}_{2p} = \frac{\int_{-\infty}^{\infty} E \cdot D_{\text{O}2p}(E) dE}{\int_{-\infty}^{\infty} D_{\text{O}2p}(E) dE} - E_{\text{Fermi}}$$

where  $\bar{O}_{2p}$  is the O  $p$ -band center,  $E$  is the electron energy,  $D_{\text{O}2p}(E)$  is the DOS projected onto the  $2p$  orbitals of O, and the  $E_{\text{Fermi}}$  is the Fermi energy. The integrals were taken over all states, not just filled states.

## Supplementary Methods

**Chemicals.** All metal nitrate salts, potassium permanganate, cobalt sulfate heptahydrate, manganese sulfate monohydrate, citric acid, hydrogen peroxide, and glucose were obtained from Nanjing Chemical Reagent Co., Ltd. Ethylene glycol and hydrochloric acid were purchased from Sinopharm Chemical Reagent Co., Ltd. TMB (3,3',5,5'-tetramethylbenzidine) and other chemicals were purchased from Aladdin Chemical Reagent Co., Ltd. All chemical reagents were used as received without further purification. Deionized water produced by Millipore system was used in all experiments.

**Instrumentation.** Inductively coupled plasma-optical emission spectroscopy (ICP-OES) measurements were performed on an Optima 5300DV analyzer.

**Synthesis of LaNiO<sub>3</sub>-H<sub>2</sub>.** The LaNiO<sub>3</sub>-H<sub>2</sub> was obtained by controlled reduction of as-prepared LaNiO<sub>3</sub> with H<sub>2</sub>. Specifically, the as-prepared LaNiO<sub>3</sub> was heated to 350 °C at a ramp rate of 5 °C·min<sup>-1</sup> and maintained at 350 °C for 2 h under a forming gas of 5% H<sub>2</sub> in Argon.

**Synthesis of MnO<sub>2</sub>.** KMnO<sub>4</sub> (1.94 g in 20 mL H<sub>2</sub>O) and MnSO<sub>4</sub>·H<sub>2</sub>O (0.845 g in 5 mL H<sub>2</sub>O) were added into a Teflon-lined autoclave and heated at 160 °C for 12 h. The resulting product was centrifuged and washed with H<sub>2</sub>O for several times. The obtained MnO<sub>2</sub> was dried at 60 °C for overnight.<sup>42</sup>

**Synthesis of Mn<sub>2</sub>O<sub>3-δ</sub>.** 0.474 g KMnO<sub>4</sub> and 0.595 g glucose were dissolved in 10 mL H<sub>2</sub>O, respectively. The glucose solution was added dropwise to the KMnO<sub>4</sub> solution under stirring and the mixed solution was further stirred for half an h. The resulting solution was then transferred to a Teflon-lined autoclave and heated at 150 °C for 10 h. The resulting product was centrifuged and washed with H<sub>2</sub>O for several times, which was then dried at 60 °C for overnight. The solid powder was finally annealed at 550 °C for 4 h with a ramp rate of 5 °C·min<sup>-1</sup> to obtain final Mn<sub>2</sub>O<sub>3-δ</sub>.<sup>42</sup>

**Synthesis of CoO.** 0.14 g CoSO<sub>4</sub>·7H<sub>2</sub>O and 0.3 g urea were dissolved in 6.25 mL ethanol and 41.25 mL H<sub>2</sub>O mixed solution under stirring, followed by adding 4 mL ammonia solution (28%) dropwise. After stirring for 30 min, the resulting solution was transferred into a Teflon-lined autoclave and heated at 120 °C for 12 h. The resulting product was centrifuged and washed with H<sub>2</sub>O for several times, which was then dried at 60 °C for overnight. The solid powder was finally annealed at 450 °C in Argon for 3 h to obtain CoO nanoparticles.<sup>43</sup>

**Synthesis of Fe<sub>2</sub>O<sub>3</sub>.** PVP (polyvinylpyrrolidone, K30, 3.8 g) and K<sub>4</sub>Fe(CN)<sub>6</sub>·3H<sub>2</sub>O (0.11 g) were added to a HCl solution (0.1 M, 50 mL) under stirring. After stirring for 30 min, the solution was heated to 80 °C and maintained at 80 °C for 20 h to form Prussian blue product. The resulting product was washed for several times with H<sub>2</sub>O and absolute ethanol, which was then dried at 25 °C in a vacuum for overnight. The as-prepared Prussian blue was heated at 550 °C for 6 h with a ramp rate of 2 °C·min<sup>-1</sup> to obtain the final Fe<sub>2</sub>O<sub>3</sub> particles.<sup>44</sup>

**Synthesis of NiO.** 0.5 g NaOH and 1.66 g PVP (K30) were dissolved in 25 mL H<sub>2</sub>O and 1.45 g Ni(NO<sub>3</sub>)<sub>2</sub>·6H<sub>2</sub>O was dissolved in 10 mL H<sub>2</sub>O, respectively. The nickel nitrate aqueous solution was then added to the NaOH/PVP solution dropwise under stirring. The resulting solution was stirred for 3 h to obtain the NiO precursor, followed by washing with H<sub>2</sub>O and ethanol for several times and drying at 60 °C for overnight. Then, the precursor was calcinated at 650 °C for 2 h in air with a temperature ramp rate of 5 °C·min<sup>-1</sup> to form the final NiO nanoparticles.<sup>45</sup>

**Synthesis of Mn<sub>3</sub>O<sub>4</sub>.** An 80% hydrazine solution (5 mL) was added to an aqueous solution of 0.2 M KMnO<sub>4</sub> (20 mL) under stirring and the mixed solution was further stirred for 12 h. The resulting product was centrifuged and washed with H<sub>2</sub>O for several times, which was then dried at 110 °C for overnight.<sup>42</sup>

**Synthesis of Fe<sub>3</sub>O<sub>4</sub>.** 1.35 g FeCl<sub>3</sub> was dissolved in 40 mL ethylene glycol, followed by the addition of 3.6 g NaOAc under stirring. The resulting solution was then transferred to a Teflon-lined autoclave and heated at 200 °C for 6 h. The resulting product was centrifuged and washed with ethanol for several times, which was then dried at 60 °C for overnight.<sup>46</sup>

**Synthesis of Co<sub>3</sub>O<sub>4</sub>.** 2 g Co(CH<sub>3</sub>COO)<sub>2</sub>·4H<sub>2</sub>O was dissolved in 25 mL H<sub>2</sub>O, followed by adding 2.5 mL ammonia solution (28%) dropwise under stirring and the mixed solution was further stirred for half an h. The resulting solution was then transferred to a Teflon-lined autoclave and heated at 150 °C for 3 h. The resulting product was centrifuged and washed with H<sub>2</sub>O for several times, which was then dried at 60 °C for overnight.<sup>47</sup>

**Synthesis of CuO.** 0.02 M Cu(CH<sub>3</sub>COO)<sub>2</sub>·H<sub>2</sub>O (75 mL) was mixed with 0.25 mL CH<sub>3</sub>COOH in a flask equipped with a refluxing device. The resulting solution was heated to boiling, followed by the addition of 0.04 g·mL<sup>-1</sup> NaOH (5 mL) under stirring. Then, the mixed solution was further stirred for 5 min. The resulting product was centrifuged and washed with H<sub>2</sub>O for several times, which was then dried at 60 °C for overnight.<sup>48</sup>

**Synthesis of Cu(OH)<sub>2</sub>.** 17 mg CuCl<sub>2</sub>·2H<sub>2</sub>O and 130.5 mg PVP (molecular weight = 55000) were dissolved in 40 mL ethanol in a round-bottomed flask. The mixed solution was ultrasonicated for 10 min and stirred for 30 min. Then, 7.7 mg NaBH<sub>4</sub> was dissolved in 10 mL of ethanol and quickly added to the above solution under stirring. After stirring for 72 h, the resulting product was centrifuged and washed with ethanol for several times to obtain Cu(OH)<sub>2</sub> nanoparticles. To synthesis Cu(OH)<sub>2</sub> supercages, the Cu(OH)<sub>2</sub> nanoparticles and 20 mg PVP (molecular weight = 1300000) were dispersed in 20 mL of deionized water by ultrasonication for 10 min in a round-bottomed flask. A copper-ammonia complex solution was prepared by mixing 24.16 mg Cu(NO<sub>3</sub>)<sub>2</sub>·3H<sub>2</sub>O and 0.4 mL NH<sub>3</sub>·H<sub>2</sub>O (28%) in 19.6 mL H<sub>2</sub>O. Subsequently, the copper-ammonia complex solution was added to the above Cu(OH)<sub>2</sub> nanoparticles solution under stirring and the mixed solution was further stirred for 10 min. The resulting product was centrifuged and washed with methanol for several times, which was then dried at 60 °C for overnight.<sup>49</sup>

**Synthesis of GO-COOH.** 40 mg GO (graphene oxide) was added into 20 mL H<sub>2</sub>O, and then the GO aqueous solution was sonicated for 2 h to obtain a clear solution. Subsequently, 4.8 g NaOH and 4 g chloroacetic acid were added into the above GO solution and sonicated for 3 h. The resulting solution was centrifuged and washed with H<sub>2</sub>O for several times, which was then dried at 60 °C for overnight.<sup>50</sup>

**Synthesis of SWNT.** 50 mg SWNT (single-walled carbon nanotubes) was added into the mixture of 98% sulfuric acid and 70% nitric acid (3:1), and then the resulting solution was sonicated for 24 h. After sonication, the resulting product was centrifuged and washed with H<sub>2</sub>O for several times, which was then dried at 60 °C for overnight.<sup>51</sup>

**Synthesis of CeO<sub>2</sub>.** 2.52 g cerium nitrate was dissolved in 100 mL of water-ethylene glycol mixture (1:1). After the temperature of the solution reached 60 °C, 16 mL of NH<sub>3</sub>·H<sub>2</sub>O (28%) was rapidly added and the resulting mixture was vigorously stirred at 60 °C for 3 h until a yellow-colored dispersion was obtained. The reaction mixture was cooled and centrifuged to obtain yellow CeO<sub>2</sub> precipitate, which was washed multiple times with ethanol and water till the pH was neutral. The obtained CeO<sub>2</sub>

precipitate was further dispersed in 100 mL of distilled water containing  $30 \text{ mg}\cdot\text{mL}^{-1}$  sodium citrate. After sonication for 30 min, a transparent solution was obtained. Then, ethanol was added into above solution to assist the precipitation of citrate-stabilized nanoceria. The precipitate was washed with ethanol for several times to remove residual citrate. Finally, the nanoceria were redispersed into distilled water to obtain a highly transparent solution.<sup>52</sup>

**Oxygen vacancies of TMOs.** To quantify the oxidation state of TMOs, iodometric titrations were performed according to the referenced procedure.<sup>53</sup> The amount of oxygen vacancies  $\delta$  in metal oxides were deduced by the oxidation state of TMOs. Briefly, 3 mL of 2 M KI solution and given quantities of TMOs were dissolved in a  $\text{N}_2$ -saturated HCl aqueous solution (1 M) under  $\text{N}_2$  atmosphere and allowed to disperse and dissolve for five minutes. Then, the solution was titrated to a faint golden color with 0.1 M of  $\text{Na}_2\text{S}_2\text{O}_3$  aqueous solution. Towards the end point, 0.5 mL starch indicator is added and the solution was titrated until clear. The titration was repeated three times for each oxide, from which an average oxidation state, oxygen vacancy and standard error were obtained.

**Magnetic measurement of  $\text{LaCoO}_3$ .** The temperature-dependent magnetization of  $\text{LaCoO}_3$  was measured on a MPMS SQUID magnetometer (MPMS-3, Quantum Design) with a magnetic field of  $H = 1 \text{ kOe}$  under field-cooling procedures to calculate the  $e_g$  occupancy of cobalt ions.

## Supplementary References

- 1 Suntivich, J., May, K. J., Gasteiger, H. A., Goodenough, J. B. & Shao-Horn, Y. A perovskite oxide optimized for oxygen evolution catalysis from molecular orbital principles. *Science* **334**, 1383-1385 (2011).
- 2 Suntivich, J. *et al.* Design principles for oxygen-reduction activity on perovskite oxide catalysts for fuel cells and metal-air batteries. *Nat. Chem.* **3**, 546-550 (2011).
- 3 Yan, J. Q., Zhou, J. S. & Goodenough, J. B. Bond-length fluctuations and the spin-state transition in  $\text{LCoO}_3$  (L=La, Pr, and Nd). *Phys. Rev. B* **69** (2004).
- 4 Zhou, S. *et al.* Engineering electrocatalytic activity in nanosized perovskite cobaltite through surface spin-state transition. *Nat. Commun.* **7**, 11510 (2016).
- 5 Ritter, C. *et al.* Influence of oxygen content on the structural, magnetotransport, and magnetic properties of  $\text{LaMnO}_{3+\delta}$ . *Phys. Rev. B* **56**, 8902-8911 (1997).
- 6 Medvedeva, J. E., Anisimov, V. I., Mryasov, O. N. & Freeman, A. J. The role of Coulomb correlation in magnetic and transport properties of doped manganites:  $\text{La}_{0.5}\text{Sr}_{0.5}\text{MnO}_3$  and  $\text{LaSr}_2\text{Mn}_2\text{O}_7$ . *J. Phys.: Condens. Matter* **14**, 4533-4542 (2002).
- 7 Kim, J., Yin, X., Tsao, K.-C., Fang, S. & Yang, H.  $\text{Ca}_2\text{Mn}_2\text{O}_5$  as Oxygen-Deficient Perovskite Electrocatalyst for Oxygen Evolution Reaction. *J. Am. Chem. Soc.* **136**, 14646-14649 (2014).
- 8 Guo, Y. *et al.* Engineering the electronic state of a perovskite electrocatalyst for synergistically enhanced oxygen evolution reaction. *Adv. Mater.* **27**, 5989-5994 (2015).
- 9 Russo, U., Nodari, L., Faticanti, M., Kuncser, V. & Filoti, G. Local interactions and electronic phenomena in substituted  $\text{LaFeO}_3$  perovskites. *Solid State Ionics* **176**, 97-102 (2005).
- 10 Kawasaki, S., Takano, M. & Takeda, Y. Ferromagnetic properties of  $\text{SrFe}_{1-x}\text{Co}_x\text{O}_3$  synthesized under high pressure. *J. Solid State Chem.* **121**, 174-180 (1996).
- 11 Lee, S. *et al.* Enhanced intrinsic catalytic activity of  $\lambda\text{-MnO}_2$  by electrochemical tuning and oxygen vacancy generation. *Angew. Chem.-Int. Edit.* **55**, 8599-8604 (2016).
- 12 Maitra, U., Naidu, B. S., Govindaraj, A. & Rao, C. N. R. Importance of trivalency and the  $e_g^1$  configuration in the photocatalytic oxidation of water by Mn and Co oxides. *Proc. Natl. Acad. Sci. USA* **110**, 11704-11707 (2013).
- 13 Liu, Y. W. *et al.* Low overpotential in vacancy-rich ultrathin  $\text{CoSe}_2$  nanosheets for water oxidation. *J. Am. Chem. Soc.* **136**, 15670-15675 (2014).
- 14 Zhao, Y. *et al.* Ultrafine NiO nanosheets stabilized by  $\text{TiO}_2$  from monolayer NiTi-LDH precursors: An active water oxidation electrocatalyst. *J. Am. Chem. Soc.* **138**, 6517-6524 (2016).
- 15 Pozun, Z. D. & Henkelman, G. Hybrid density functional theory band structure engineering in hematite. *J. Chem. Phys.* **134**, 224706 (2011).
- 16 Liu, Q. *et al.* NiO nanoparticles modified with 5,10,15,20-tetrakis(4-carboxyl phenyl)-porphyrin: Promising peroxidase mimetics for  $\text{H}_2\text{O}_2$  and glucose detection. *Biosens. Bioelectron.* **64**, 147-153 (2015).
- 17 Ray, C. *et al.* Intrinsic peroxidase-like activity of mesoporous nickel oxide for selective cysteine sensing. *J. Mater. Chem. B* **2**, 6097-6105 (2014).

- 18 Liu, X. *et al.* BSA-templated MnO<sub>2</sub> nanoparticles as both peroxidase and oxidase mimics. *Analyst* **137**, 4552-4558 (2012).
- 19 Chen, Z. *et al.* Dual enzyme-like activities of iron oxide nanoparticles and their implication for diminishing cytotoxicity. *ACS Nano* **6**, 4001-4012 (2012).
- 20 Roy, A., Sahoo, R., Ray, C., Dutta, S. & Pal, T. Soft template induced phase selective synthesis of Fe<sub>2</sub>O<sub>3</sub> nanomagnets: one step towards peroxidase-mimic activity allowing colorimetric sensing of thioglycolic acid. *RSC Adv.* **6**, 32308-32318 (2016).
- 21 Bhattacharjee, S., Bousquet, E. & Ghosez, P. First-principles study of the dielectric and dynamical properties of orthorhombic CaMnO<sub>3</sub>. *J. Phys.: Condens. Matter* **20**, 255229 (2008).
- 22 Wang, K., Jiang, W., Chen, J.-N. & Huang, J.-Q. Study of the electronic structure and half-metallicity of CaMnO<sub>3</sub>/BaTiO<sub>3</sub> superlattice. *Superlattice Microst* **97**, 116-124 (2016).
- 23 Zhang, Q., Yunoki, S. & Iop. A first-principles study for electronic and magnetic properties of LaFeO<sub>3</sub>/LaCrO<sub>3</sub> superlattices. *J. Phys.: Conf. Ser.* **400**, 032126 (2012).
- 24 Dabaghmanesh, S., Sarmadian, N., Neyts, E. C. & Partoens, B. A first principles study of p-type defects in LaCrO<sub>3</sub>. *Phys. Chem. Chem. Phys.* **19**, 22870-22876 (2017).
- 25 Mahadevan, P., Shanthi, N. & Sarma, D. D. Electronic structure of LaCrO<sub>3</sub>, LaMnO<sub>3</sub> and LaFeO<sub>3</sub> from ab initio spin-polarized calculations. *J. Phys.: Condens. Matter* **9**, 3129-3138 (1997).
- 26 Nguyen, T. T. & Bach, T. C. Strain effects on multiferroic heterointerface La<sub>0.5</sub>Sr<sub>0.5</sub>MnO<sub>3</sub>/BaTiO<sub>3</sub> by DFT calculations. *Adv. Nat. Sci.: Nanosci. Nanotechnol.* **9**, 015012 (2018).
- 27 Radaelli, P. G., Cox, D. E., Marezio, M. & Cheong, S. W. Charge, orbital, and magnetic ordering in La<sub>0.5</sub>Ca<sub>0.5</sub>MnO<sub>3</sub>. *Phys. Rev. B* **55**, 3015-3023 (1997).
- 28 Guan, L. *et al.* Electronic structure and optical properties of LaNiO<sub>3</sub>: First-principles calculations. *Solid State Commun.* **150**, 2011-2014 (2010).
- 29 Pan, C.-C. *et al.* First-principle study of O vacancy on LaNiO<sub>3</sub> (001) surface. *Int. J. Hydrogen Energ.* **41**, 15756-15763 (2016).
- 30 Malashevich, A. & Ismail-Beigi, S. First-principles study of oxygen-deficient LaNiO<sub>3</sub> structures. *Phys. Rev. B* **92**, 144102 (2015).
- 31 Pan, C. *et al.* A First Principles Study of H<sub>2</sub> Adsorption on LaNiO<sub>3</sub>(001) Surfaces. *Materials* **10**, 36 (2017).
- 32 Laref, A. & Sekkal, W. First-principle calculations of anomalous spin-state excitation in LaCoO<sub>3</sub>. *Mater. Chem. Phys.* **123**, 125-131 (2010).
- 33 Hsu, H., Umemoto, K., Cococcioni, M. & Wentzcovitch, R. First-principles study for low-spin LaCoO<sub>3</sub> with a structurally consistent Hubbard *U*. *Phys. Rev. B* **79**, 125124 (2009).
- 34 Rivero, P., Meunier, V. & Shelton, W. Electronic, structural, and magnetic properties of LaMnO<sub>3</sub> phase transition at high temperature. *Phys. Rev. B* **93**, 024111 (2016).
- 35 Abuova, A. U. *et al.* First principles modeling of Ag adsorption on the LaMnO<sub>3</sub> (001) surfaces. *Solid State Ionics* **273**, 46-50 (2015).
- 36 Pilania, G. & Ramprasad, R. Adsorption of atomic oxygen on cubic PbTiO<sub>3</sub> and LaMnO<sub>3</sub> (001) surfaces: A density functional theory study. *Surf. Sci.* **604**, 1889-1893 (2010).

- 37 Satpathy, S., Popovic, Z. S. & Vukajlovic, F. R. Electronic structure of the perovskite oxides:  $\text{La}_{1-x}\text{Ca}_x\text{MnO}_3$ . *Phys. Rev. Lett.* **76**, 960-963 (1996).
- 38 Berger, R. F., Broberg, D. P. & Neaton, J. B. Tuning the electronic structure of  $\text{SrTiO}_3/\text{SrFeO}_{3-x}$  superlattices via composition and vacancy control. *APL Mater.* **2**, 046101 (2014).
- 39 Joly, V. L. J., Joy, P. A., Date, S. K. & Gopinath, C. S. Two ferromagnetic phases with different spin states of Mn and Ni in  $\text{LaMn}_{0.5}\text{Ni}_{0.5}\text{O}_3$ . *Phys. Rev. B* **65**, 184416 (2002).
- 40 Ritzmann, A. M., Munoz-Garcia, A. B., Pavone, M., Keith, J. A. & Carter, E. A. Ab Initio DFT + U Analysis of Oxygen Vacancy Formation and Migration in  $\text{La}_{1-x}\text{Sr}_x\text{FeO}_{3-\delta}$  ( $x=0, 0.25, 0.50$ ). *Chem. Mater.* **25**, 3011-3019 (2013).
- 41 Hwang, J. *et al.* Perovskites in catalysis and electrocatalysis. *Science* **358**, 751-756 (2017).
- 42 Pokhrel, R., Goetz, M. K., Shaner, S. E., Wu, X. & Stahl, S. S. The "Best Catalyst" for water oxidation depends on the oxidation method employed: A case study of manganese oxides. *J. Am. Chem. Soc.* **137**, 8384-8387 (2015).
- 43 Jiang, Z.-J. & Jiang, Z. Interaction induced high catalytic activities of CoO nanoparticles grown on nitrogen-doped hollow graphene microspheres for oxygen reduction and evolution reactions. *Sci. Rep.* **6**, 27081 (2016).
- 44 Zhang, L., Wu, H. B., Madhavi, S., Hng, H. H. & Lou, X. W. Formation of  $\text{Fe}_2\text{O}_3$  Microboxes with Hierarchical Shell Structures from Metal-Organic Frameworks and Their Lithium Storage Properties. *J. Am. Chem. Soc.* **134**, 17388-17391 (2012).
- 45 Mahaleh, Y. B. M., Sadrnezhaad, S. K. & Hosseini, D. NiO nanoparticles synthesis by chemical precipitation and effect of applied surfactant on distribution of particle size. *J. Nanomater.* **2008**, 470595 (2008).
- 46 Deng, H. *et al.* Monodisperse magnetic single-crystal ferrite microspheres. *Angew. Chem.-Int. Edit.* **44**, 2782-2785 (2005).
- 47 Dong, Y., He, K., Yin, L. & Zhang, A. A facile route to controlled synthesis of  $\text{Co}_3\text{O}_4$  nanoparticles and their environmental catalytic properties. *Nanotechnology* **18**, 435602 (2007).
- 48 Chen, W. *et al.* Peroxidase-like activity of water-soluble cupric oxide nanoparticles and its analytical application for detection of hydrogen peroxide and glucose. *Analyst* **137**, 1706-1712 (2012).
- 49 Cai, R. *et al.* Single nanoparticle to 3D supercage: Framing for an artificial enzyme system. *J. Am. Chem. Soc.* **137**, 13957-13963 (2015).
- 50 Sun, X. *et al.* Nano-graphene oxide for cellular imaging and drug delivery. *Nano Res.* **1**, 203-212 (2008).
- 51 Song, Y. *et al.* Label-free colorimetric detection of single nucleotide polymorphism by using single-walled carbon nanotube intrinsic peroxidase-like activity. *Chem. Euro. J.* **16**, 3617-3621 (2010).
- 52 Muhammad, F., Wang, A., Qi, W., Zhang, S. & Zhu, G. Intracellular antioxidants dissolve man-made antioxidant nanoparticles: Using redox vulnerability of nanoceria to develop a responsive drug delivery system. *ACS Appl. Mater. Interfaces* **6**, 19424-19433 (2014).



- 53 Grimaud, A. *et al.* Double perovskites as a family of highly active catalysts for oxygen evolution in alkaline solution. *Nat. Commun.* **4**, 2439 (2013).
